# Supplementary material
Source: publisher figshare collection journal article supplement (https://acs.figshare.com/ndownloader/files/8655205)
Supplement: Supplementary file 1 [file 8655205]

**Benzimidazolines convert sulphur dioxide to  
bisulfate at room temperature and atmospheric  
pressure utilizing aerial oxygen**

***Sonam Mehrotra,<sup>†,‡</sup> Sakthi Raje<sup>†,‡</sup> Anant Kumar Jain<sup>†</sup> and Raja Angamuthu<sup>\*,†</sup>***

Laboratory of Inorganic Synthesis and Bioinspired Catalysis (LISBIC), Department of Chemistry, Indian Institute of Technology Kanpur, Kanpur 208016 (India).

E-mail: [raja@iitk.ac.in](mailto:raja@iitk.ac.in)

|                                                                                                                            |            |
|----------------------------------------------------------------------------------------------------------------------------|------------|
| <b>Figure S 1.</b> $^1\text{H}$ NMR of MB1-H in $\text{CDCl}_3$ .                                                          | <b>S11</b> |
| <b>Figure S 2.</b> $^{13}\text{C}$ NMR of MB1-H in $\text{CDCl}_3$ .                                                       | <b>S12</b> |
| <b>Figure S 3.</b> ESI-MS of MB1-H.                                                                                        | <b>S13</b> |
| <b>Figure S 4.</b> Isotopic distribution simulated for $\text{MB1}^+$ cation.                                              | <b>S14</b> |
| <b>Figure S 5.</b> $^1\text{H}$ NMR of $[\text{MB1}](\text{HSO}_4)$ .                                                      | <b>S15</b> |
| <b>Figure S 6.</b> $^{13}\text{C}$ NMR of $[\text{MB1}](\text{HSO}_4)$ .                                                   | <b>S16</b> |
| <b>Figure S 7.</b> ESI-MS of $[\text{MB1}](\text{HSO}_4)$ ( <b>cation mode</b> ).                                          | <b>S17</b> |
| <b>Figure S 8.</b> ESI-MS of $[\text{MB1}](\text{HSO}_4)$ ( <b>anion mode</b> ).                                           | <b>S18</b> |
| <b>Figure S 9.</b> Isotopic distribution simulated for bisulphate anion.                                                   | <b>S19</b> |
| <b>Figure S 10.</b> $^1\text{H}$ NMR of MB2-H in $\text{DMSO-d}_6$ .                                                       | <b>S20</b> |
| <b>Figure S 11.</b> $^{13}\text{C}$ NMR of MB2-H in $\text{DMSO-d}_6$ .                                                    | <b>S21</b> |
| <b>Figure S 12.</b> ESI-MS of MB2-H.                                                                                       | <b>S22</b> |
| <b>Figure S 13.</b> Isotopic distribution simulated for $\text{MB2}^+$ cation.                                             | <b>S23</b> |
| <b>Figure S 14.</b> $^1\text{H}$ NMR of $[\text{MB2}](\text{HSO}_4)$ in $\text{DMSO-d}_6$ .                                | <b>S24</b> |
| <b>Figure S 15.</b> $^{13}\text{C}$ NMR $[\text{MB2}](\text{HSO}_4)$ in $\text{DMSO-d}_6$ .                                | <b>S25</b> |
| <b>Figure S 16.</b> ESI-MS of $[\text{MB2}](\text{HSO}_4)$ ( <b>cation mode</b> ).                                         | <b>S26</b> |
| <b>Figure S 17.</b> ESI-MS of $[\text{MB2}](\text{HSO}_4)$ ( <b>anion mode</b> ).                                          | <b>S27</b> |
| <b>Figure S 18.</b> Isotopic distribution simulated for $[\text{HSO}_4^- \cdots \text{HSO}_4^- + \text{H}^+]^-$ .          | <b>S28</b> |
| <b>Figure S 19.</b> Isotopic distribution simulated for $[\text{MB2}^+ \cdots (\text{HSO}_4^- \cdots \text{HSO}_4^-)]^-$ . | <b>S29</b> |
| <b>Figure S 20.</b> Isotopic distribution simulated for $[(\text{MB2HSO}_4)_2 - \text{H}^+]^-$ .                           | <b>S30</b> |
| <b>Figure S 21.</b> Isotopic distribution simulated for $[(\text{MB2HSO}_4)_2 + \text{HSO}_4]^-$ .                         | <b>S31</b> |
| <b>Figure S 22.</b> Isotopic distribution simulated for $[(\text{MB2HSO}_4)_3 - \text{H}^+]^-$ .                           | <b>S32</b> |
| <b>Figure S 23.</b> $^1\text{H}$ NMR of MB3-H in $\text{CDCl}_3$ .                                                         | <b>S33</b> |
| <b>Figure S 24.</b> $^{13}\text{C}$ NMR MB3-H in $\text{CDCl}_3$ .                                                         | <b>S34</b> |
| <b>Figure S 25.</b> ESI-MS of MB3-H.                                                                                       | <b>S35</b> |
| <b>Figure S 26.</b> Isotopic distribution simulated for $\text{MB3}^+$ cation.                                             | <b>S36</b> |
| <b>Figure S 27.</b> $^1\text{H}$ NMR of $[\text{MB3}](\text{HSO}_4)$ in $\text{DMSO-d}_6$ .                                | <b>S37</b> |
| <b>Figure S 28.</b> $^{13}\text{C}$ NMR of $[\text{MB3}](\text{HSO}_4)$ in $\text{DMSO-d}_6$ .                             | <b>S38</b> |

|                                                                                    |            |
|------------------------------------------------------------------------------------|------------|
| <b>Figure S 29.</b> ESI-MS of [MB3](HSO <sub>4</sub> ) ( <b>cation mode</b> )..... | <b>S39</b> |
| <b>Figure S 30.</b> ESI-MS of [MB3](HSO <sub>4</sub> ) ( <b>anion mode</b> ).....  | <b>S40</b> |
| <b>Figure S 31.</b> Solid state structure of [MB1](HSO <sub>4</sub> ) .....        | <b>S41</b> |
| <b>Figure S 32.</b> Packing diagram of [MB1](HSO <sub>4</sub> ) .....              | <b>S42</b> |
| <b>Figure S 33.</b> Solid state structure of [MB2](HSO <sub>4</sub> ) .....        | <b>S44</b> |
| <b>Figure S 34.</b> Packing diagram of [MB2](HSO <sub>4</sub> ) .....              | <b>S45</b> |
| <b>Figure S 35.</b> Solid state structure of [MB3](HSO <sub>4</sub> ) .....        | <b>S47</b> |
| <b>Figure S 36.</b> Packing diagram of [MB3](HSO <sub>4</sub> ) .....              | <b>S48</b> |
| <br>                                                                               |            |
| <b>Table S 1.</b> Crystal data for [MB1](HSO <sub>4</sub> ).....                   | <b>S43</b> |
| <b>Table S 2.</b> Crystal data for [MB2](HSO <sub>4</sub> ).....                   | <b>S46</b> |
| <b>Table S 3.</b> Crystal data for [MB3](HSO <sub>4</sub> ).....                   | <b>S49</b> |
| <b>References</b> .....                                                            | <b>S51</b> |

## Experimental Section

### Materials.

1,2-Phenylenediamine (SDFCL), p-toluenesulfonyl chloride (SDFCL), pyridine (SDFCL), dimethylsulfate (SDFCL), NaOH flakes (Fisher), 6-bromopyridine-2-carboxaldehyde (TCI India), benzaldehyde (Rankem) and salicylaldehyde (SRL) were used as received from commercial sources. Solvents were distilled under dry nitrogen atmosphere using conventional methods. *N,N'*-(1,2-Phenylene)bis(*N*,4-dimethylbenzenesulfonamide),<sup>1</sup> *N'*,*N*<sup>2</sup>-dimethylbenzene-1,2-diamine<sup>2</sup> and 1,3-dimethyl-2-phenyl-2,3-dihydro-1H-benzo[d]imidazole<sup>3</sup> were synthesized by following literature methods.

### Methods.

NMR spectra were recorded on JEOL 500 MHz and JEOL 400 MHz spectrometers. Temperature was kept constant using a variable temperature unit within the error limit of  $\pm 1$  K. The software MestReNova<sup>4</sup> was used for the processing of the NMR spectra. Tetramethylsilane (TMS) or the deuterated solvent residual peaks were used for calibration. Mass spectrometry experiments were performed on a Waters-Q-ToF-Premier-HAB213 equipped with an electrospray interface. Spectra were collected by constant infusion of the sample dissolved in methanol or acetonitrile with 0.1% formic acid. The freeware mMass was used to simulate the calculated isotopic distributions.<sup>5</sup>

### Crystal Structure Determinations.

Single-crystal X-ray data were collected at 123 K on a Bruker SMART APEX CCD diffractometer using graphite-monochromated Mo K $\alpha$  radiation ( $\lambda = 0.71069$  Å). The linear absorption coefficients, the scattering factors for the atoms, and the anomalous dispersion corrections were taken from International Tables for X-ray Crystallography. Data integration and reduction were conducted with SAINT. An empirical absorption correction was applied to the collected reflections with SADABS using XPREP. Structures were determined by direct method using SHELXTL and refined on  $F^2$  by a full-matrix least-squares technique using the SHELXL-97 program package. The lattice parameters and structural data are listed somewhere else in this Supporting Information.

**1,3-dimethyl-2-phenyl-2,3-dihydro-1H-benzo[d]imidazole:**

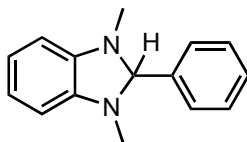

MB1-H

In 50 ml Schlenk RB, N<sup>1</sup>,N<sup>2</sup>-dimethylbenzene-1,2-diamine (0.300 g, 2.202 mmol) was dissolved in 5 ml of dry dichloromethane with activated molecular sieves 3 Å. The solution of benzaldehyde (0.233 g, 2.202 mmol) in dry dichloromethane (5 ml) was slowly added to pre-stirred dichloromethane solution at 0 °C under nitrogen atmosphere. The resulting mixture was stirred at room temperature for 24 h and filtered through cannula under nitrogen atmosphere. The yellow filtrate was concentrated and crystallized in dichloromethane solution. The resulting white crystals were filtered off and dried under high vacuum. (0.050 g, 10%).

**<sup>1</sup>H NMR (400 MHz, CDCl<sub>3</sub>):**

$\delta_{\text{H}}$  = 7.58 (m, 2H, Ar), 7.41 (m, 3H, Ar), 6.72 (dd, 2H, Ar), 6.43 (dd, 2H, Ar), 4.88 (s, 1H, CH), 2.57 (s, 6H, CH<sub>3</sub>).

**<sup>13</sup>C NMR (100 MHz, CDCl<sub>3</sub>):**

$\delta_{\text{C}}$  = 142.23, 139.20, 129.46, 128.99, 128.60, 119.41, 105.85, 94.18, 33.30.

**High Resolution ESI-MS:**

$m/z$  for C<sub>15</sub>H<sub>15</sub>N<sub>2</sub> = 223.1231 (calcd. 223.1235) = [MB1]<sup>+</sup>.

**2-(1,3-dimethyl-2,3-dihydro-1H-benzo[d]imidazol-2-yl)phenol:**

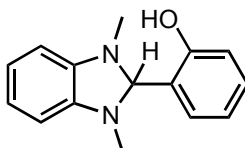

MB2-H

In 50 ml Schlenk RB, N<sup>1</sup>,N<sup>2</sup>-dimethylbenzene-1,2-diamine (0.238 g, 1.747mmol) was dissolved in 5 ml of dry dichloromethane with activated molecular sieves 3 Å. The solution of salicylaldehyde (0.213 g, 1.747mmol) in dry dichloromethane (5 ml) was slowly added to pre-stirred dichloromethane solution at 0 °C under nitrogen atmosphere. The resulting mixture was stirred at room temperature for 20 h and filtered through cannula under nitrogen atmosphere. The yellow filtrate was concentrated and added dry ethanol (5ml). The resulting pale yellow powder was filtered off and dried under high vacuum. (0.060 g, 14%).

**<sup>1</sup>H NMR (400 MHz, DMSO-d<sub>6</sub>):**

$\delta_{\text{H}}$  = 9.59 (s, 1H, OH), 7.48 (dd, 1H, Ar), 7.16 (dt, 1H, Ar), 6.85-6.56 (m, 4H, Ar), 6.40 (dd, 2H, Ar), 5.32 (s, 1H, CH), 2.46 (s, 6H, CH<sub>3</sub>).

**<sup>13</sup>C NMR (100 MHz, DMSO-d<sub>6</sub>):**

$\delta_{\text{C}}$  = 157.97, 143.15, 130.60, 130.11, 124.62, 120.18, 119.97, 116.50, 106.86, 100.44, 34.20.

**High Resolution ESI-MS:**

$m/z$  for C<sub>15</sub>H<sub>15</sub>N<sub>2</sub>O = 239.1186 (calcd. 239.1184) = [MB2]<sup>+</sup>.

**2-(6-bromopyridin-2-yl)-1,3-dimethyl-2,3-dihydro-1H-benzo[d]imidazole:**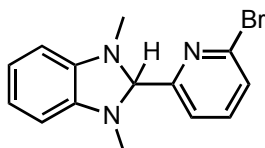

MB3-H

In a oven dried 50 mL Schlenk flask added 2 g of activated 4 Å molecular sieves and 10 mL toluene. It was stirred for 30 minutes at room temperature in N<sub>2</sub> atmosphere, added *N*<sup>1</sup>,*N*<sup>2</sup>-dimethylenzene-1,2-diamine (0.108 g, 0.73 mmol) and the brown solution was heated at 100 °C for 2 hours in N<sub>2</sub> atmosphere. It was cooled to room temperature and 6-bromopyridine-2-carboxaldehyde (0.136 g) was added as solid, immediately colour of the solution turned from brown to yellow. The yellow solution was heated at 100 °C for 12 hours and refluxed at 130 °C for 3 hours in N<sub>2</sub> atmosphere. The yellow solution cannulated to 50 mL round bottom flask and the solvent was removed under reduced pressure gave orange yellow oil. It was dried under high vacuum for 1 hour gave orange yellow solid, which was dissolved in diethyl ether and left in -35 °C forms orange crystals suitable for single crystal X-ray diffraction. (0.208 g, 94%).

**<sup>1</sup>H NMR (400MHz, CDCl<sub>3</sub>):**

δ<sub>H</sub> = 7.83 (d, 1H, Py), 7.66 (t, 1H, Py), 7.52 (d, 1H, Py), 6.74 (dd, 2H, Ph), 6.45 (dd, 2H, Ph), 5.13 (s, 1H), 2.67 (s, 6H).

**<sup>13</sup>C NMR (100MHz, CDCl<sub>3</sub>):**

δ<sub>C</sub> = 161.68, 141.98, 141.03, 139.60, 128.26, 121.54, 119.69, 106.10, 93.50, 33.96.

**High Resolution ESI-MS:**

*m/z* for C<sub>14</sub>H<sub>13</sub>BrN<sub>3</sub> = 302.0284 (calcd. 302.0293) = [MB3]<sup>+</sup>.

**Reaction of MB1-H with SO<sub>2</sub>:**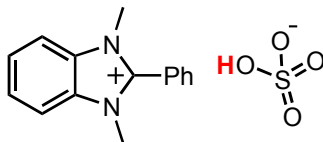

Yellow crystalline powder of HL (0.028 g, 0.124 mmol) was dissolved in dry acetonitrile (5 ml) and purged SO<sub>2</sub> at room temperature for 20 min. While purging SO<sub>2</sub>, the color of the solution turned to bright red. The resulting solution was stored at -30 °C for one day and evaporated the solvent to get brick red precipitate. Crystals were grown in mixture of methanol and acetonitrile at -30 °C (0.020 g, 51%).

**<sup>1</sup>H NMR (400 MHz, DMSO-d<sub>6</sub>):**

$\delta_{\text{H}}$  = 8.15 (dt, 2H, Ar), 7.91 (m, 2H, Ar), 7.83 (m, 5H, Ar), 3.89 (s, 6H, CH<sub>3</sub>).

**<sup>13</sup>C NMR (100 MHz, DMSO-d<sub>6</sub>):**

$\delta_{\text{C}}$  = 151.32, 133.92, 132.70, 131.73, 130.44, 127.62, 121.99, 114.39, 33.79.

**High Resolution ESI-MS (cation mode):**

$m/z$  for C<sub>15</sub>H<sub>15</sub>N<sub>2</sub> = 223.1236 (calcd. 223.1235) = MB1<sup>+</sup> cation.

**High Resolution ESI-MS (anion mode):**

$m/z$  for HSO<sub>4</sub> = 96.9582 (calcd. 96.9596) = bisulfate anion



### Reaction of MB2-H with SO<sub>2</sub>:

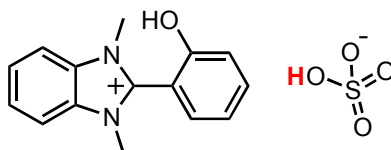

Yellow crystalline powder of HL (0.060 g, 0.249 mmol) was dissolved in dry acetonitrile (4 ml) and purged SO<sub>2</sub> at room temperature for 20 min. While purging SO<sub>2</sub>, the color of the solution turned to brown. The resulting solution was stored at -30 °C for one day and crystals were grown in one week at room temperature (0.076 g, 91%).

### <sup>1</sup>H NMR (400 MHz, DMSO-d<sub>6</sub>):

δ = 11.04 (s, 1H, OH), 8.12 (dd, 2H, Ar), 7.76 (dd, 2H, Ar), 7.67 (m, 2H, Ar), 7.22 (m, 2H, Ar), 3.87 (s, 6H, CH<sub>3</sub>).

### <sup>13</sup>C NMR (100 MHz, DMSO-d<sub>6</sub>):

δ 157.58, 149.98, 135.96, 132.72, 132.63, 127.56, 120.87, 117.84, 114.34, 108.47, 33.54.

### High Resolution ESI-MS (cation mode):

$m/z$  = 239.1167 (calcd. 239.1184) = MB2<sup>+</sup> cation.

### High Resolution ESI-MS (anion mode):

$m/z$  for HSO<sub>4</sub> = 96.9572 (calcd. 96.9596) = bisulfate anion

**Reaction of MB-3 with SO<sub>2</sub>:**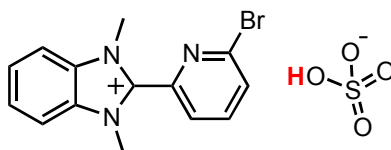

Yellow powder of HL (37 mg, 0.121 mmol) was dissolved in dry acetonitrile (4 ml) and purged SO<sub>2</sub> at room temperature for 20 min. While purging SO<sub>2</sub>, the color of the solution turned to brown. The resulting solution was stored at -30 °C for one day and crystals were formed immediately at -30 °C (0.041 mg, 85%).

**<sup>1</sup>H NMR (400 MHz, DMSO d<sub>6</sub>):**

δ<sub>H</sub> = 8.19 (d, 2H, Ph), 8.13-8.10 (m, 3H, py), 7.78 (dd, 2H, Ph), 4.06 (s, 6H, CH<sub>3</sub>).

**<sup>13</sup>C NMR (100 MHz, DMSO-d<sub>6</sub>):**

δ<sub>C</sub> = 146.80, 142.93, 142.18, 142.14, 132.98, 132.62, 128.94, 128.25, 114.69, 34.18.

**High Resolution ESI-MS (cation mode):**

*m/z* = 302.0290 (calcd. 302.0293) = MB3<sup>+</sup> cation.

**High Resolution ESI-MS (anion mode):**

*m/z* for HSO<sub>4</sub> = 96.9590 (calcd. 96.9596) = bisulfate anion



**SFigure S 2.**  $^{13}\text{C}$  NMR of MB1-H in  $\text{CDCl}_3$ .

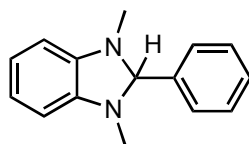

MB1-H

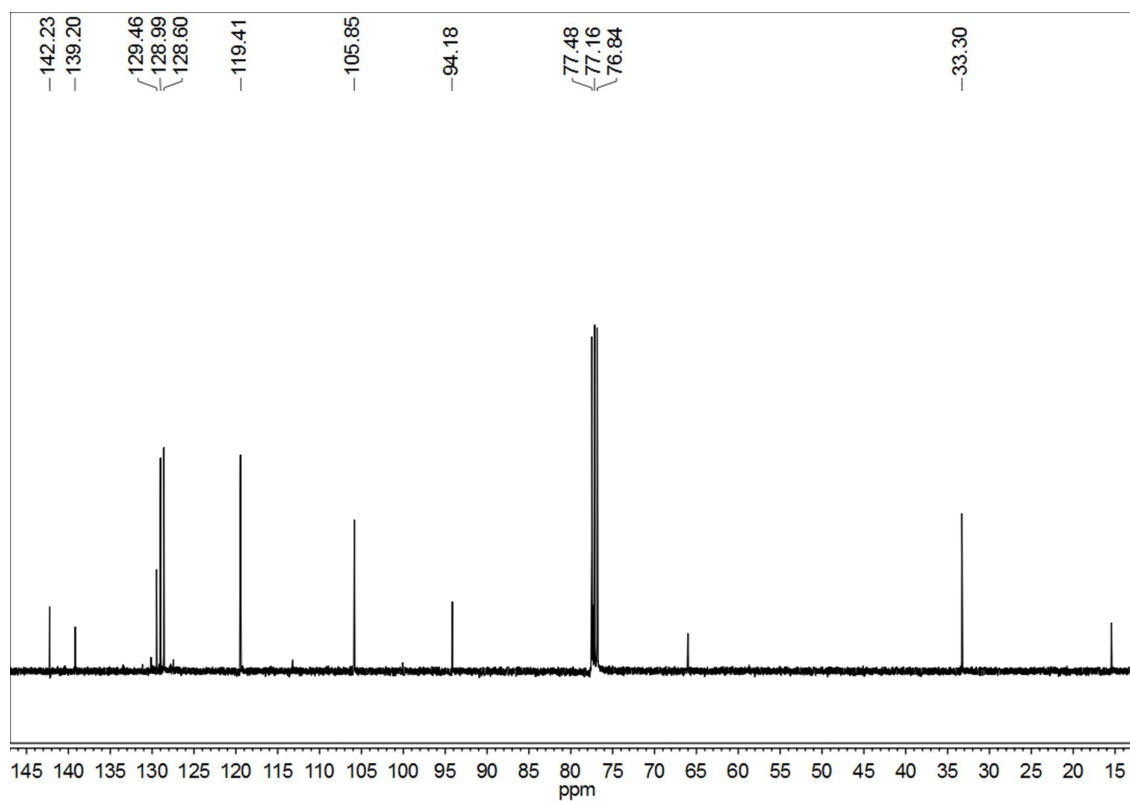

**Figure S 3.** ESI-MS of MB1-H.

$[M-H]^+ = C_{15}H_{15}N_2 = 223.1231$  (obs); 223.1235 (calcd.).

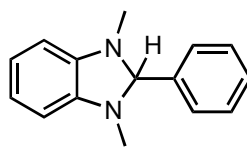

MB1-H

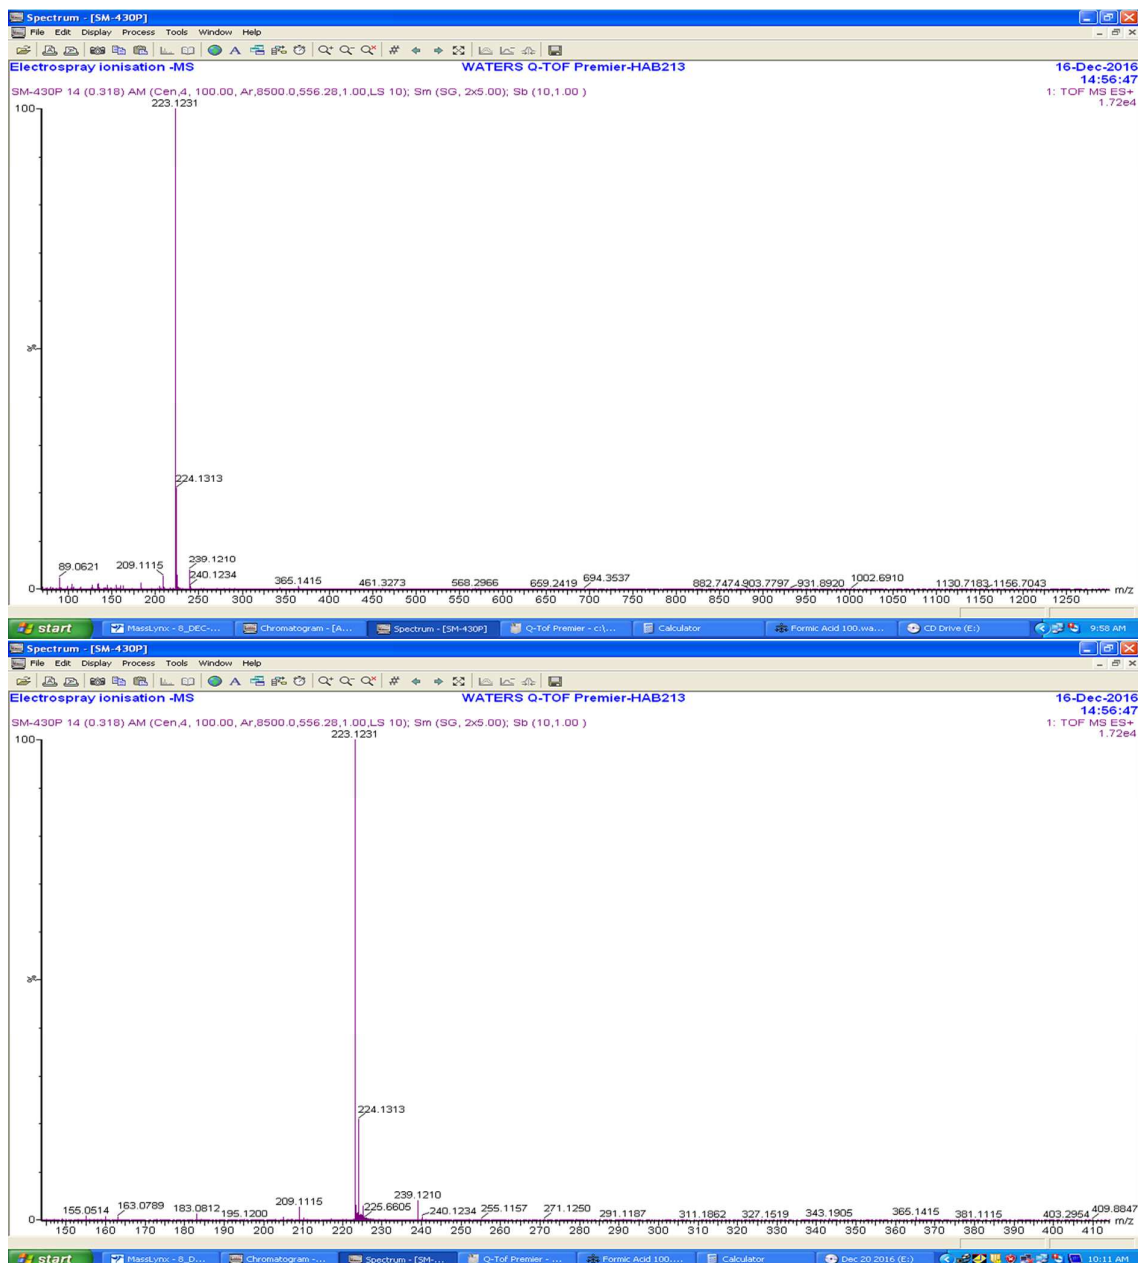

**Figure S 4.** Isotopic distribution simulated for MB1<sup>+</sup> cation.

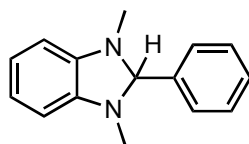

MB1-H

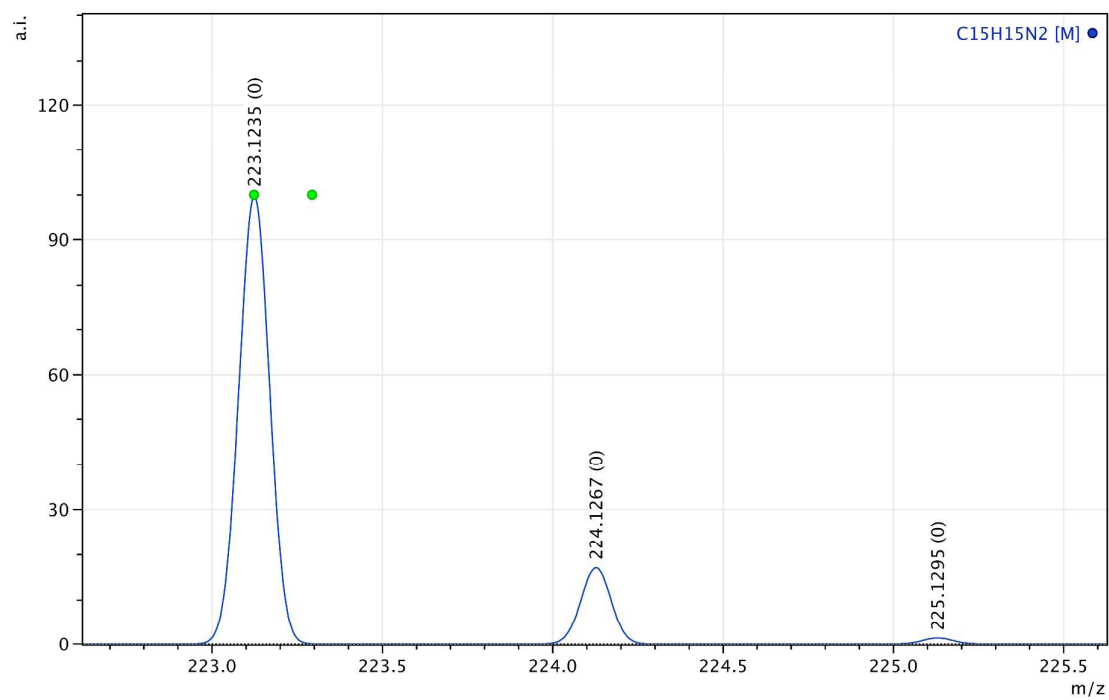

**Figure S 5.**  $^1\text{H}$  NMR of [MB1](HSO<sub>4</sub>).

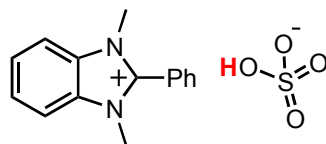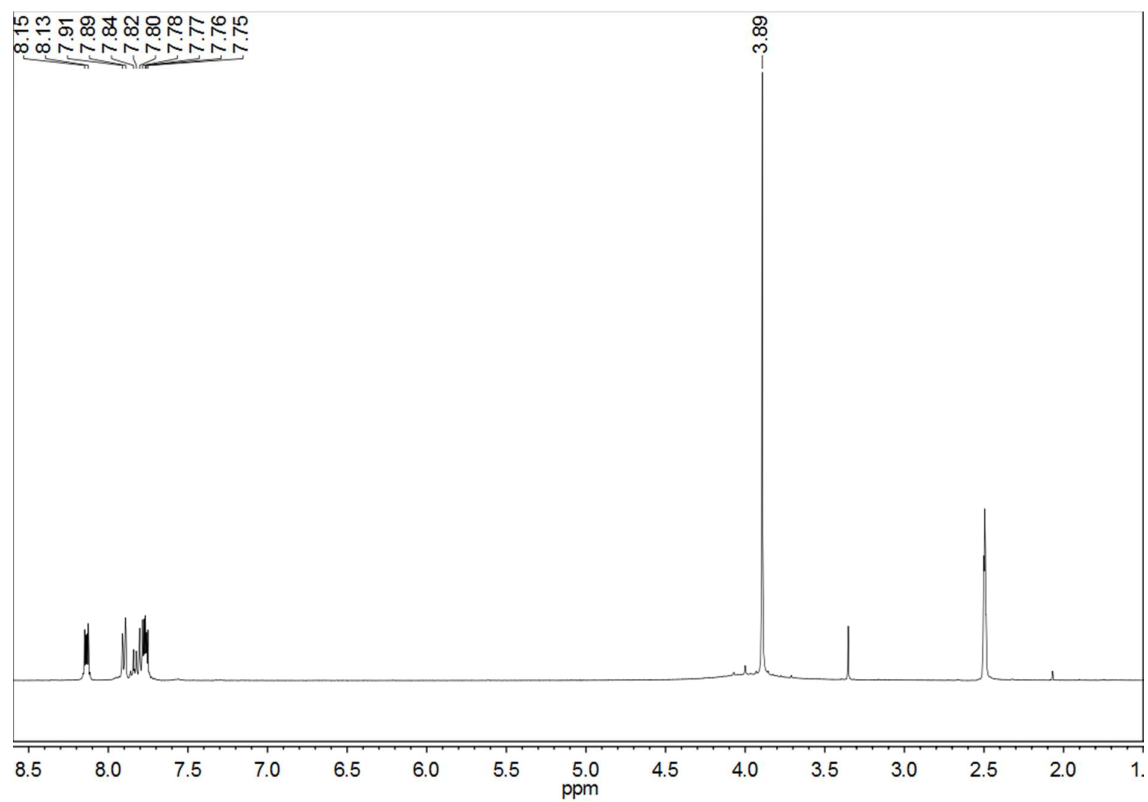

**Figure S 6.**  $^{13}\text{C}$  NMR of [MB1](HSO<sub>4</sub>).

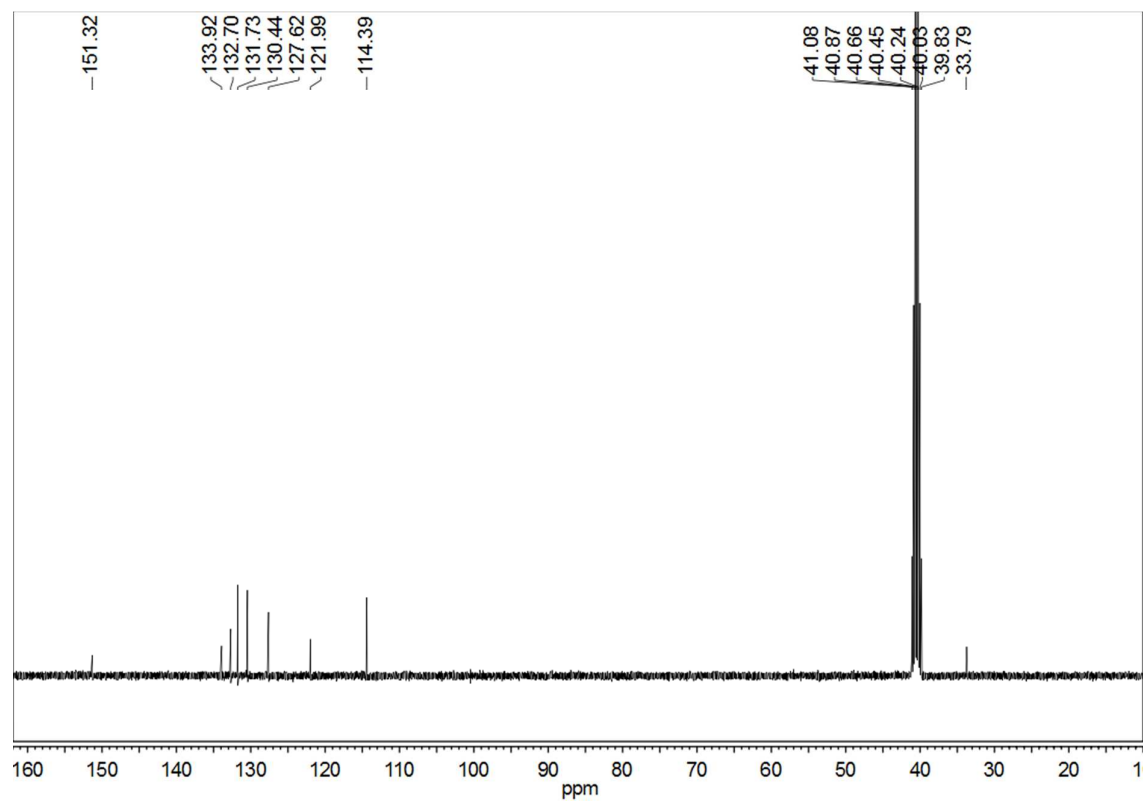



**Figure S 7. ESI-MS of [MB1](HSO<sub>4</sub>) (cation mode).**

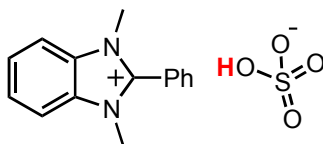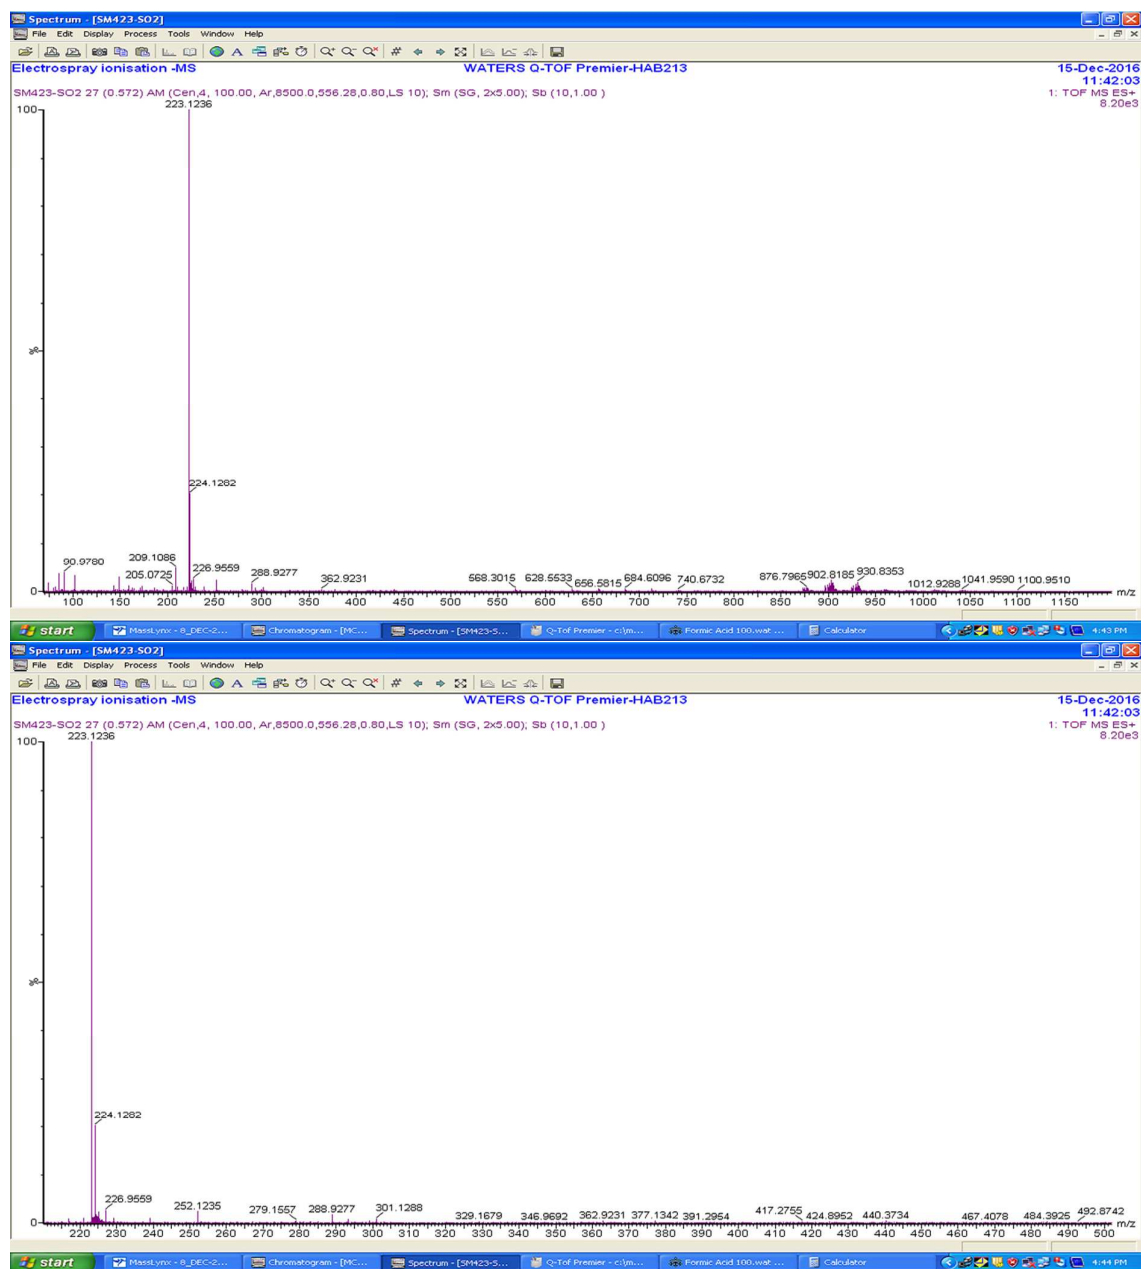

See **Figure S 4** for simulated isotopic distribution.

**Figure S 8.** ESI-MS of [MB1](HSO<sub>4</sub>) (anion mode).

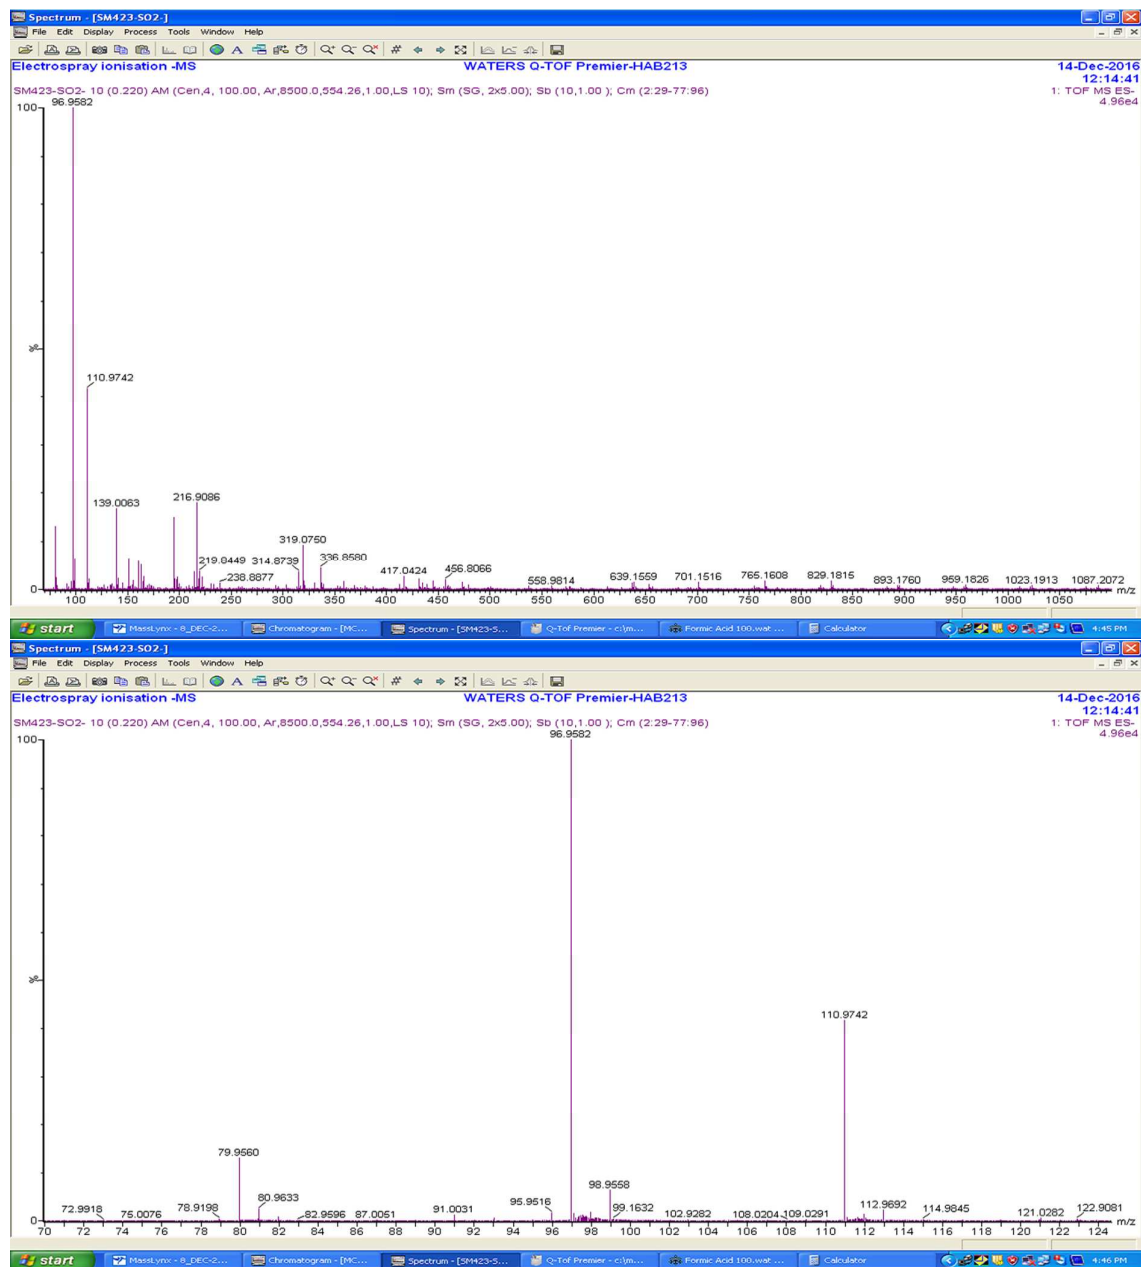

**Figure S 9.** Isotopic distribution simulated for bisulphate anion.

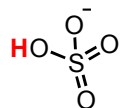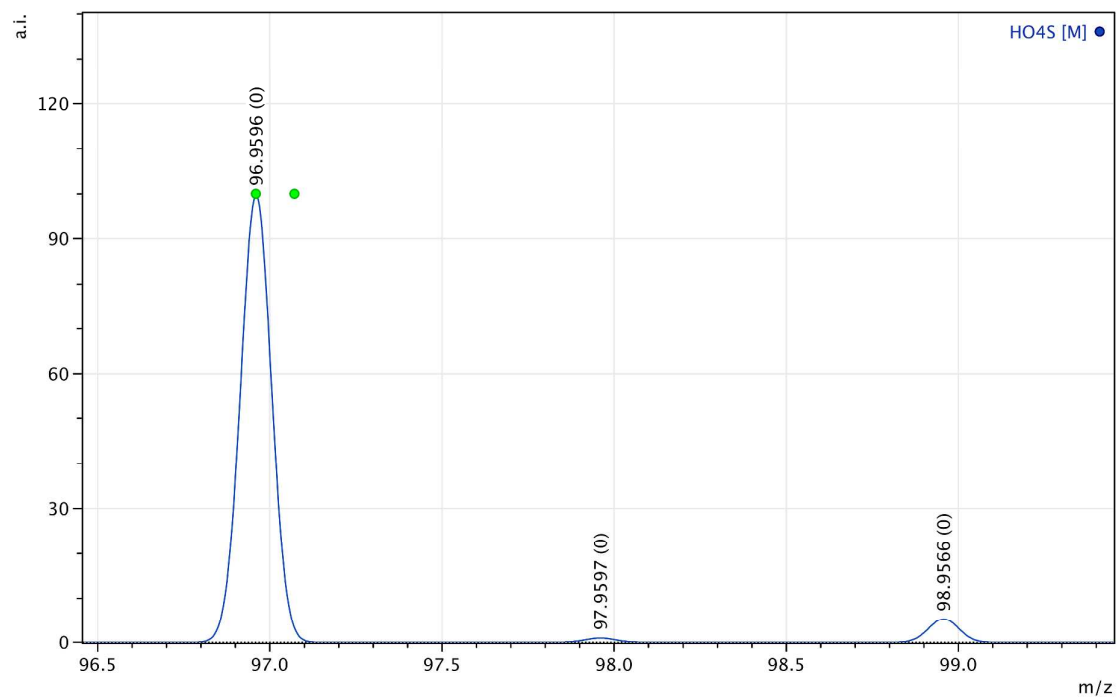

**Figure S 10.**  $^1\text{H}$  NMR of MB2-H in DMSO- $d_6$ .

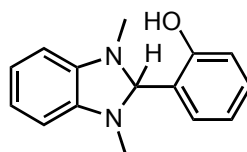

MB2-H

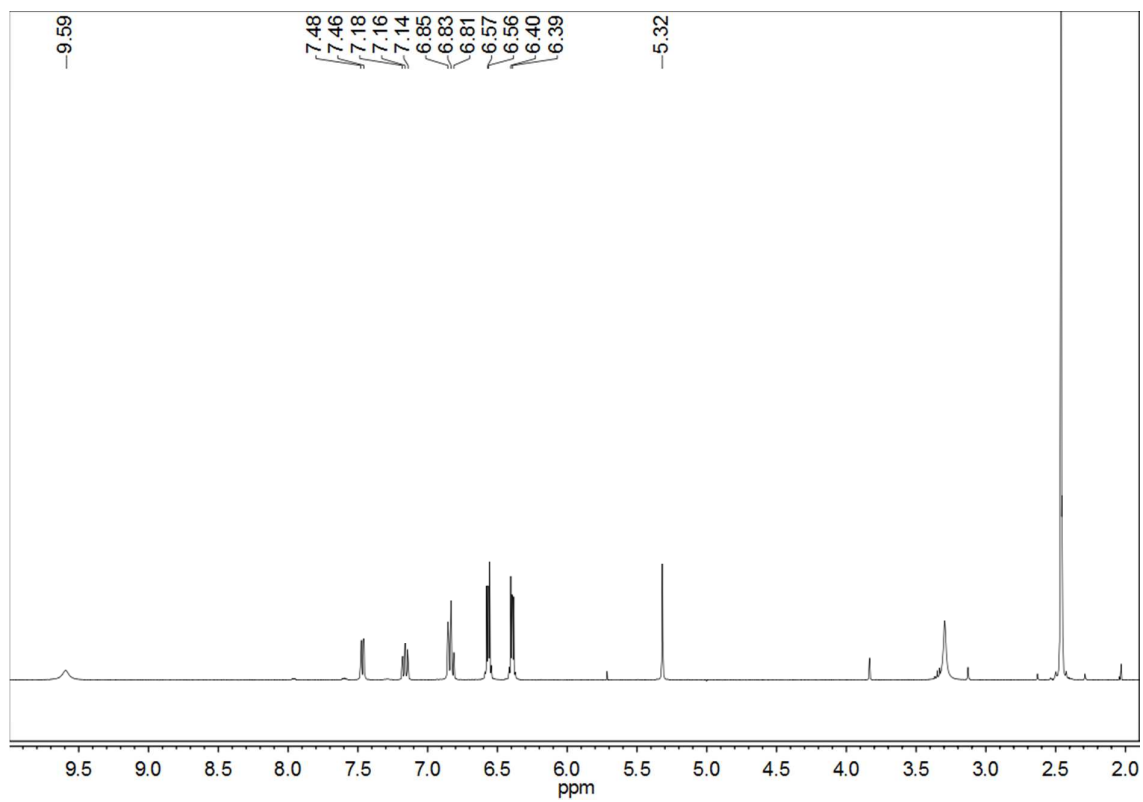

**Figure S 11.**  $^{13}\text{C}$  NMR of MB2-H in DMSO- $d_6$ .



MB2-H

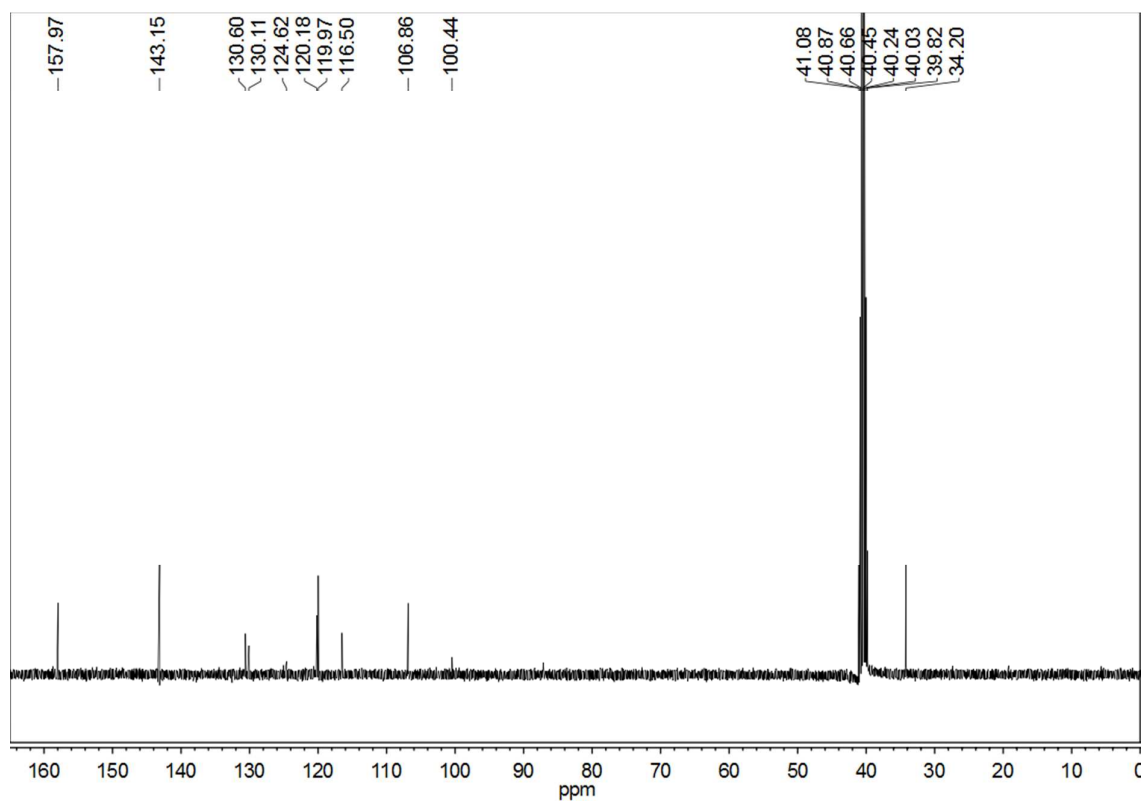

**Figure S 12.** ESI-MS of MB2-H.

$[M-H]^+ = C_{15}H_{15}N_2O = 239.1186$  (obs); 239.1184 (calcd.).

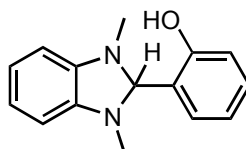

MB2-H

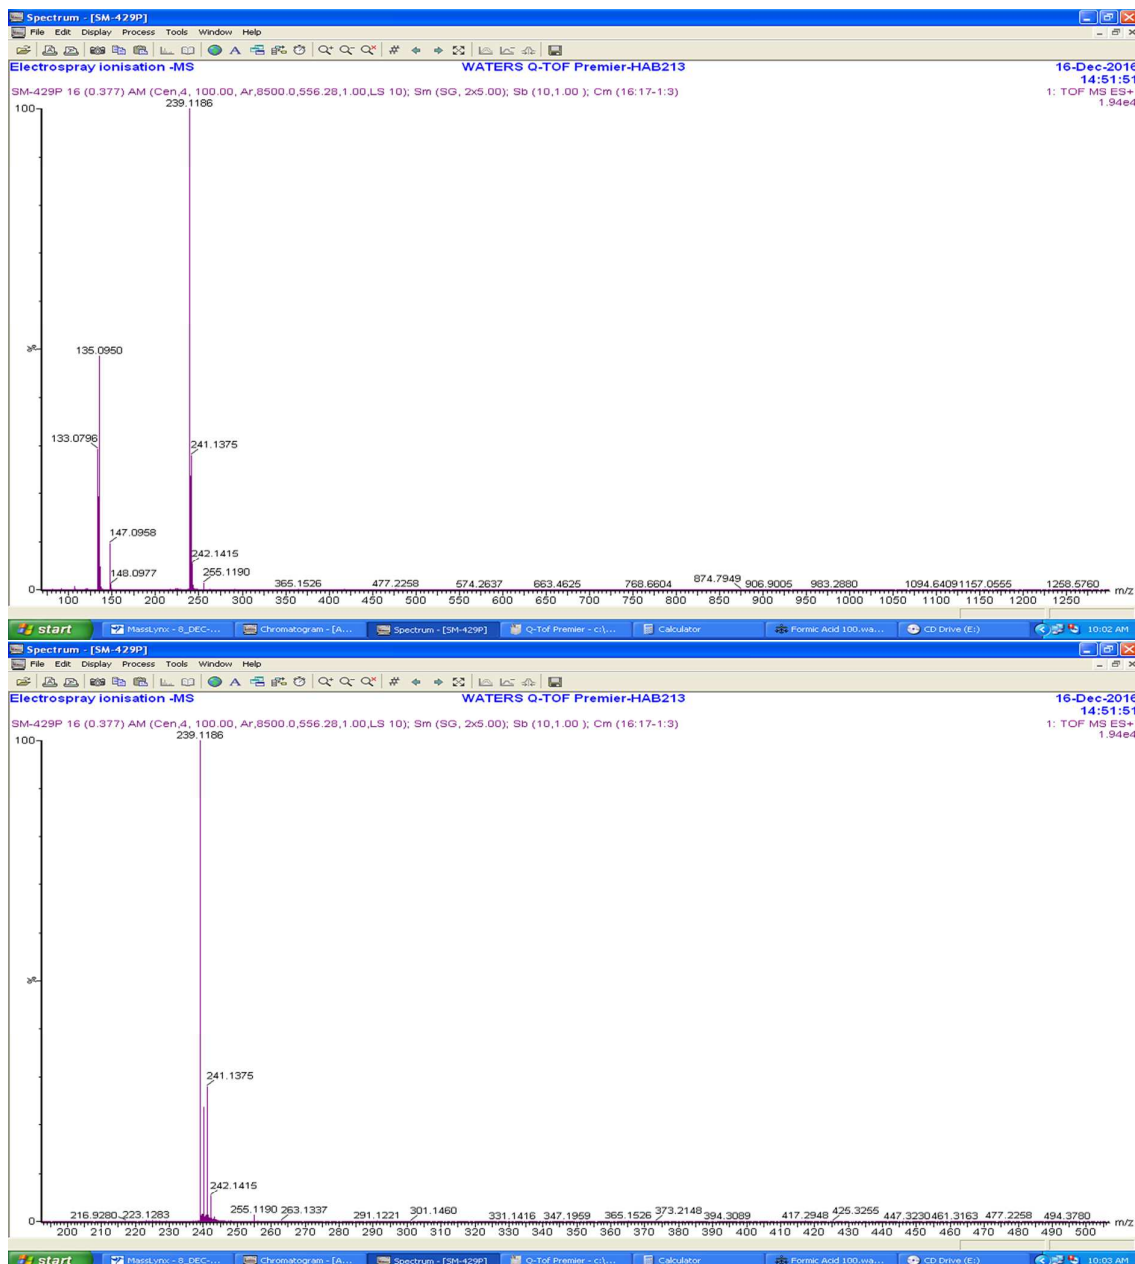

**Figure S 13.** Isotopic distribution simulated for MB2<sup>+</sup> cation.

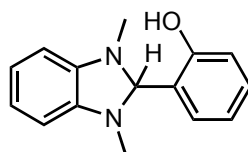

MB2-H

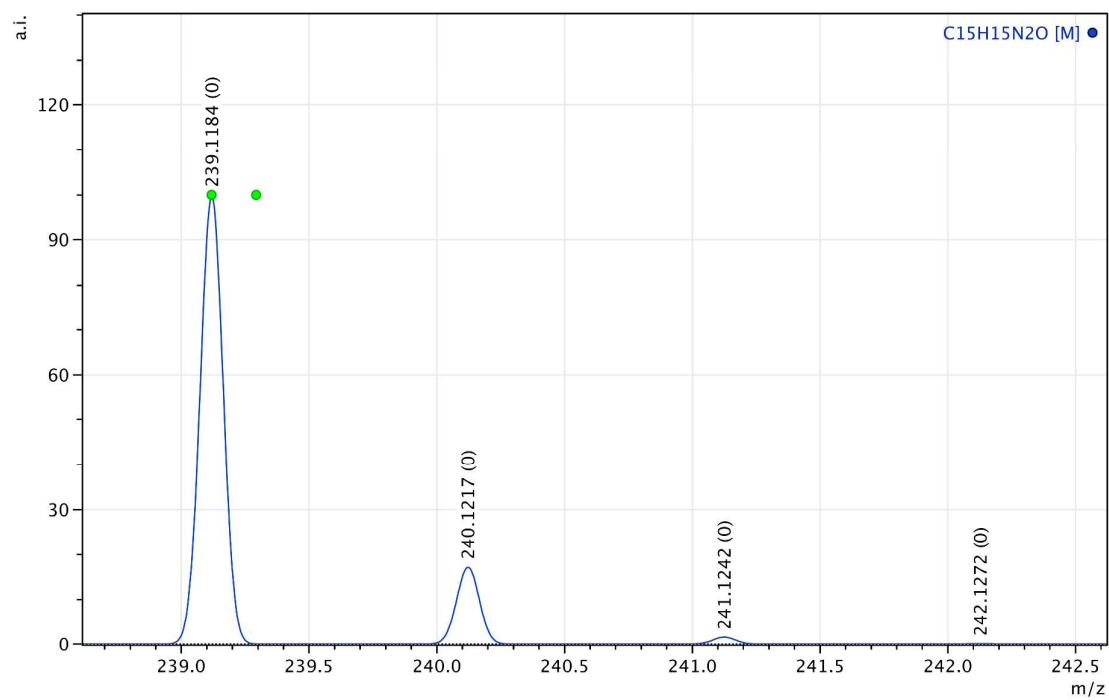

**Figure S 14.**  $^1\text{H}$  NMR of  $[\text{MB2}](\text{HSO}_4)$  in  $\text{DMSO-d}_6$ .

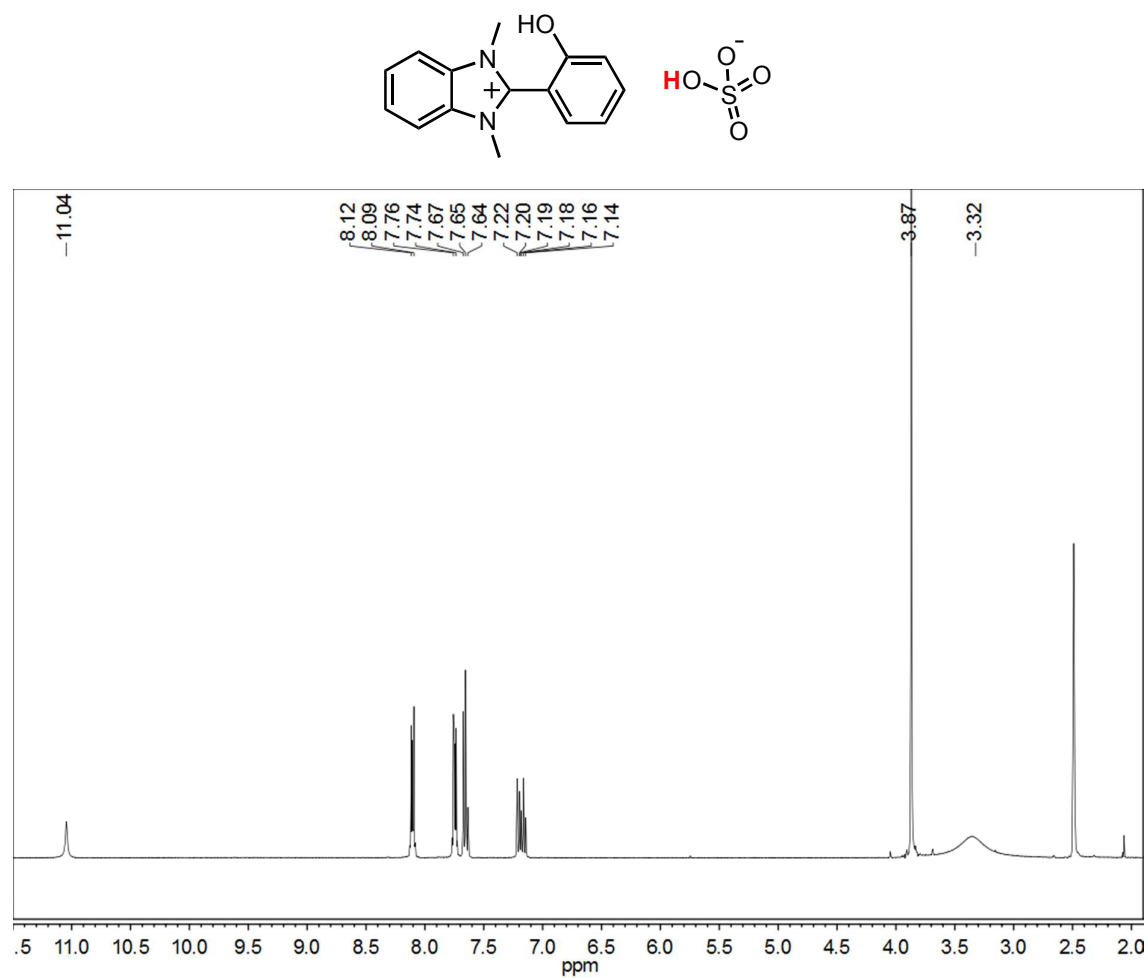



**Figure S 15.**  $^{13}\text{C}$  NMR [MB2]( $\text{HSO}_4$ ) in  $\text{DMSO-d}_6$ .

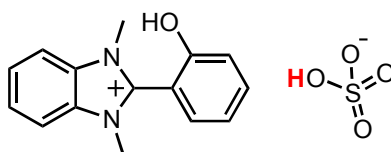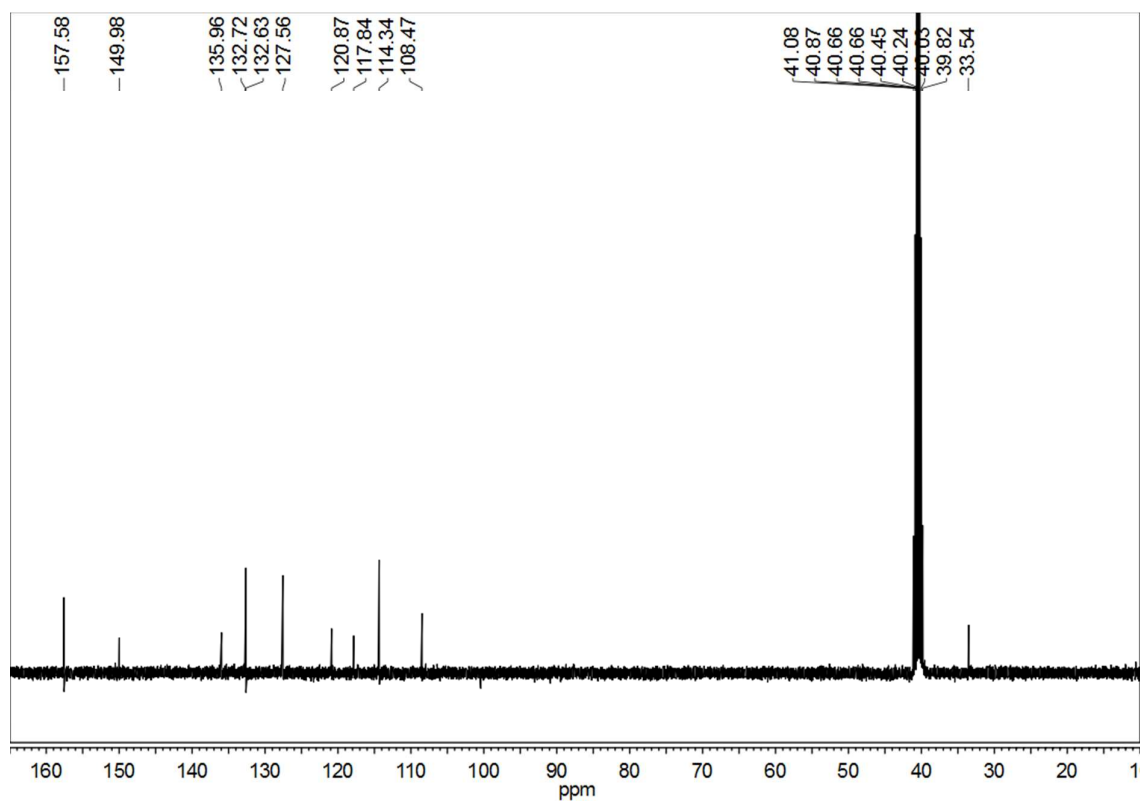

**Figure S 16. ESI-MS of [MB2](HSO<sub>4</sub>) (cation mode).**

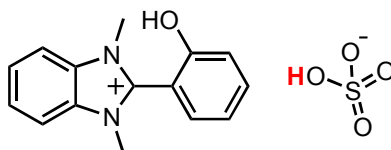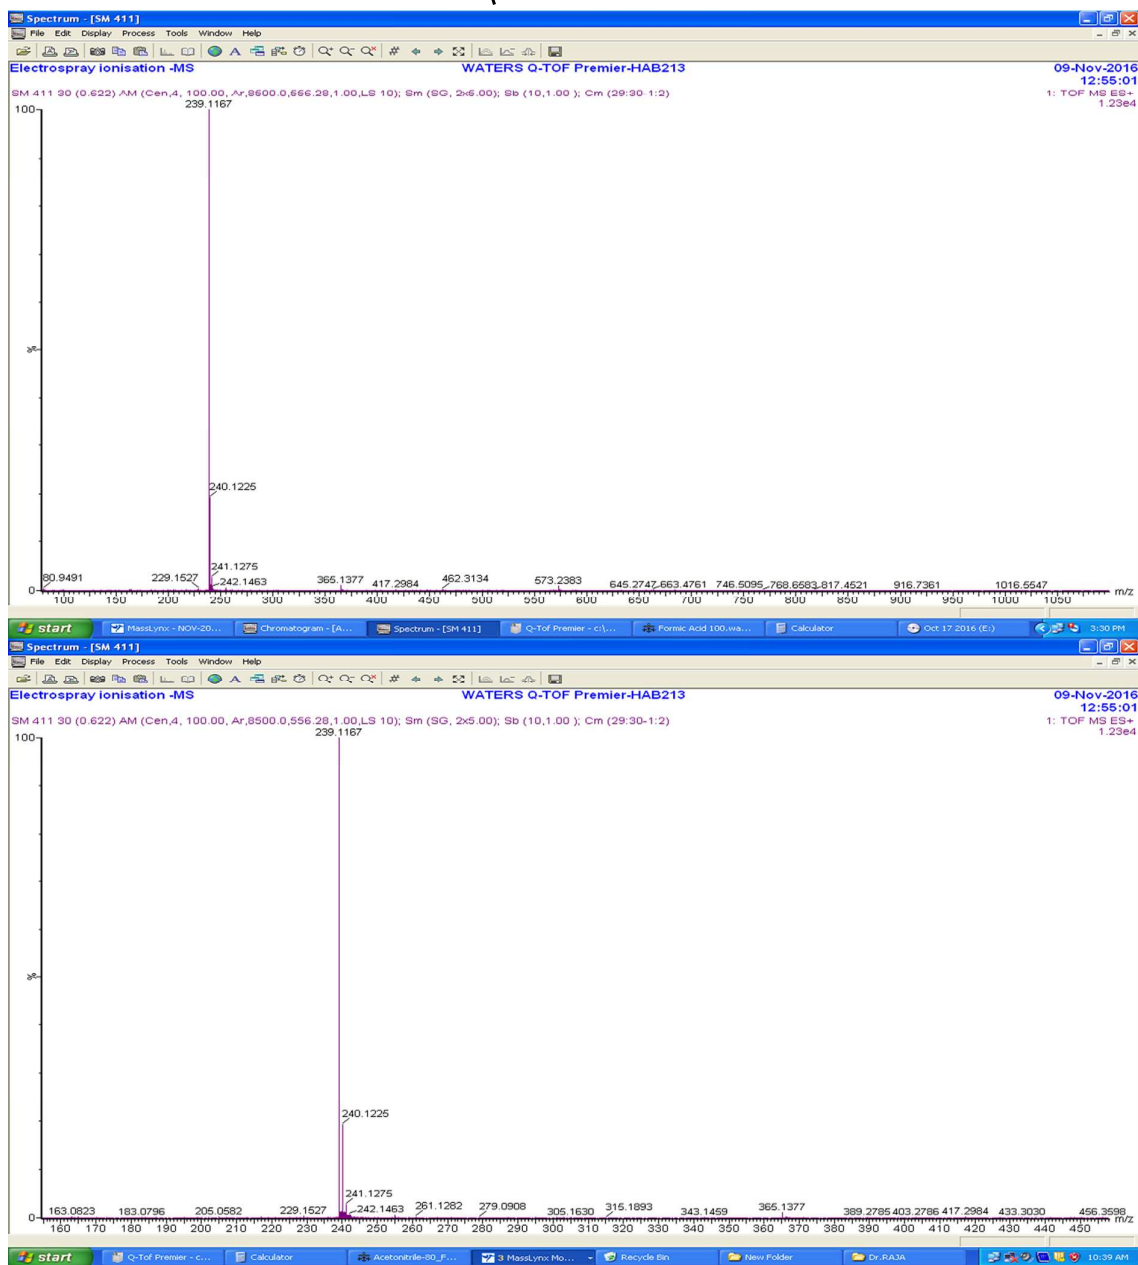

**Figure S 17. ESI-MS of [MB2](HSO<sub>4</sub>) (anion mode).**

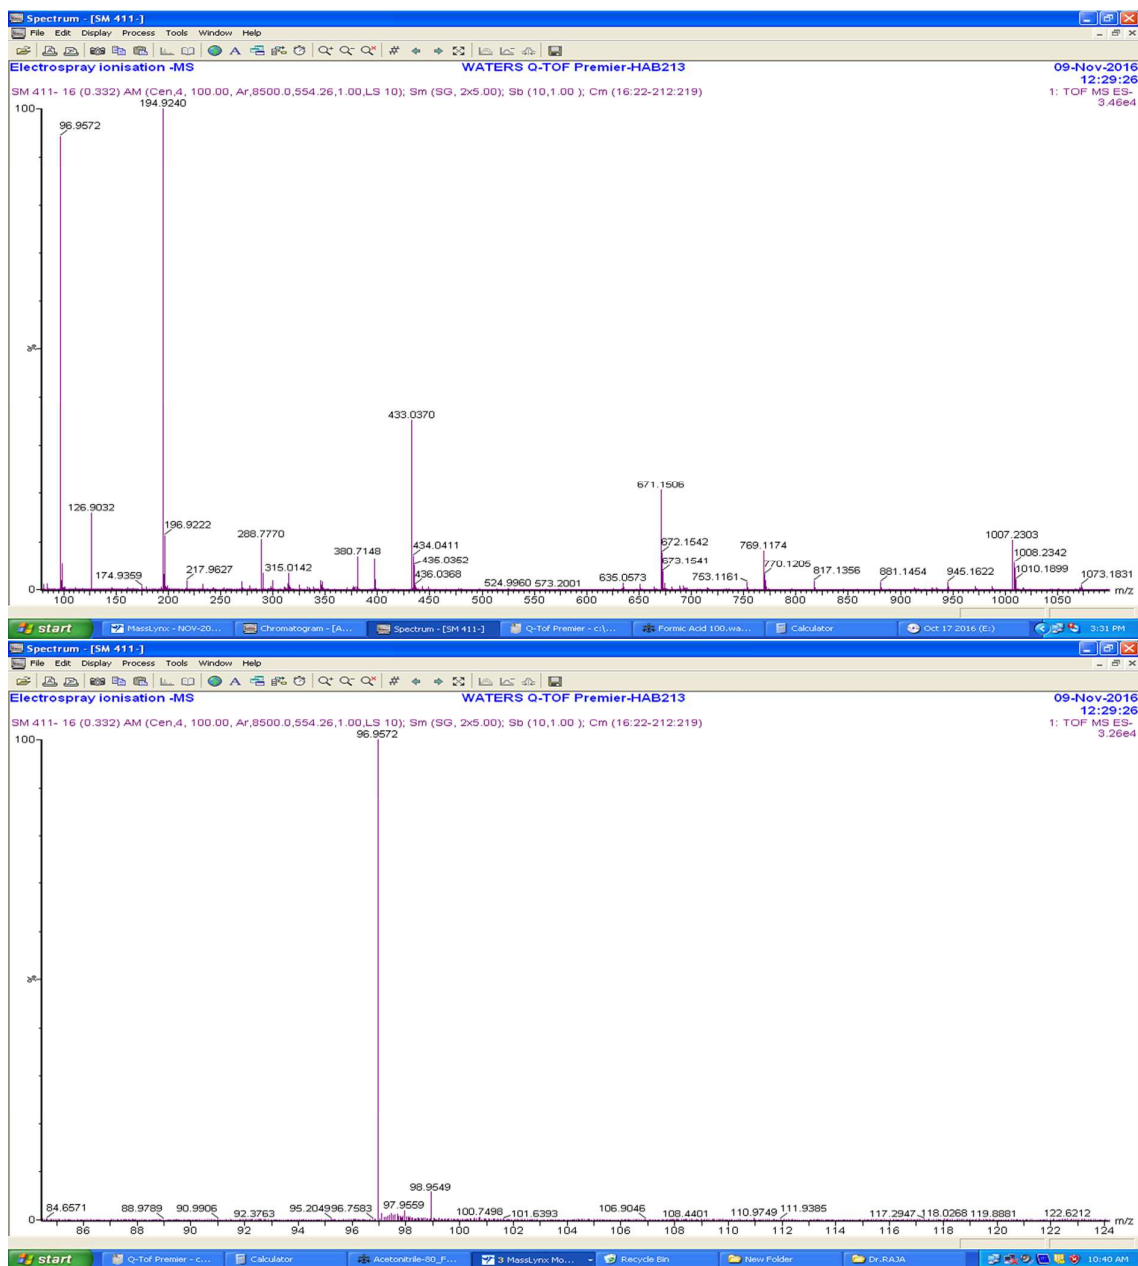

See Figure S 9, Figure S 18, Figure S 19, Figure S 20, Figure S 21, Figure S 22 for simulated isotopic distribution.

**Figure S 18.** Isotopic distribution simulated for  $[\text{HSO}_4^- \cdots \text{HSO}_4^- + \text{H}^+]^-$ .

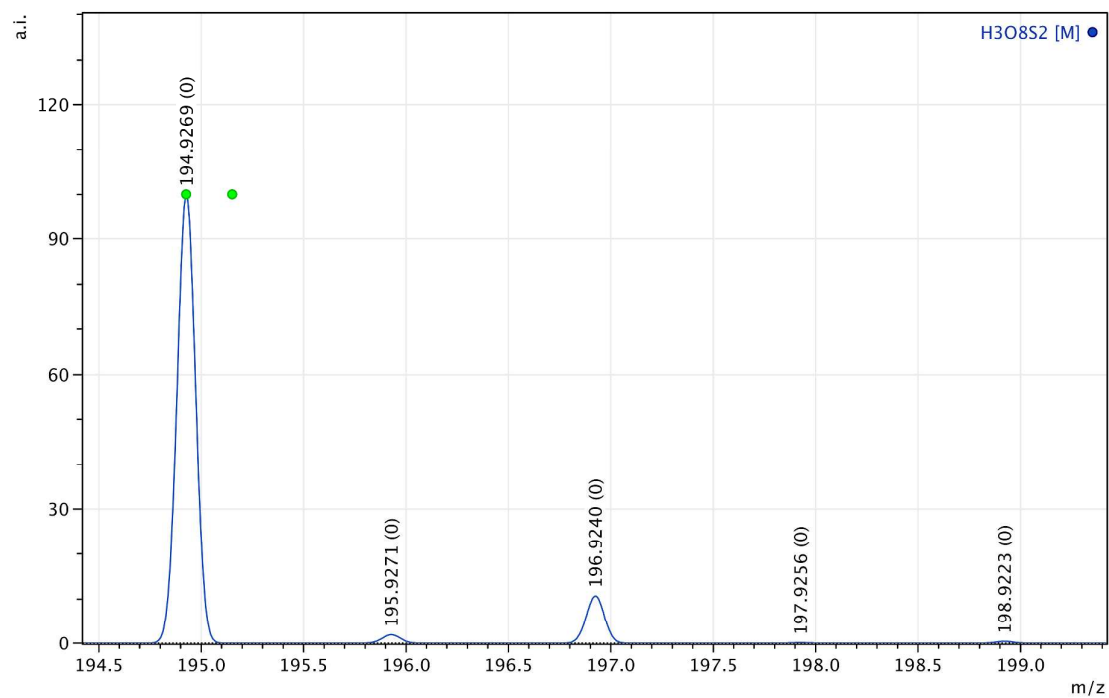

Observed at 194.9240 (calculated  $m/z$  = 194.9269). See **Figure S 17**.

**Figure S 19.** Isotopic distribution simulated for  $[\text{MB2}^+ \cdots (\text{HSO}_4^- \cdots \text{HSO}_4^-)]^-$ .

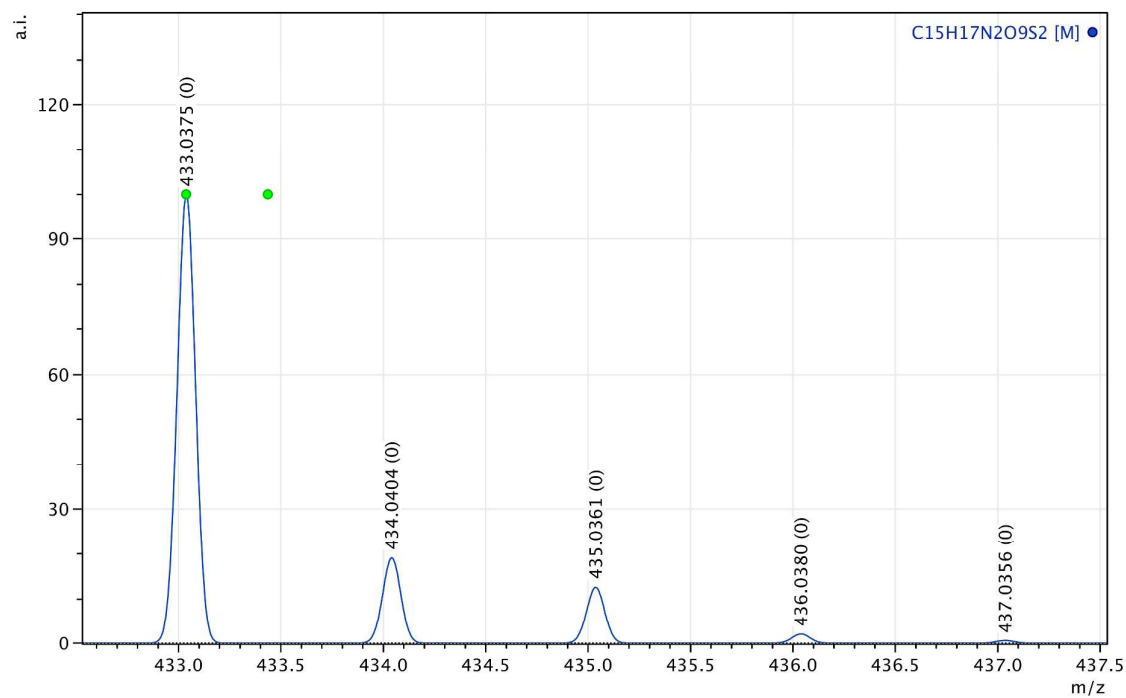

Observed at 433.0370 (calculated  $m/z$  = 433.075). See **Figure S 17**.

**Figure S 20.** Isotopic distribution simulated for  $[(\text{MB2HSO}_4)_2 - \text{H}^+]^-$ .

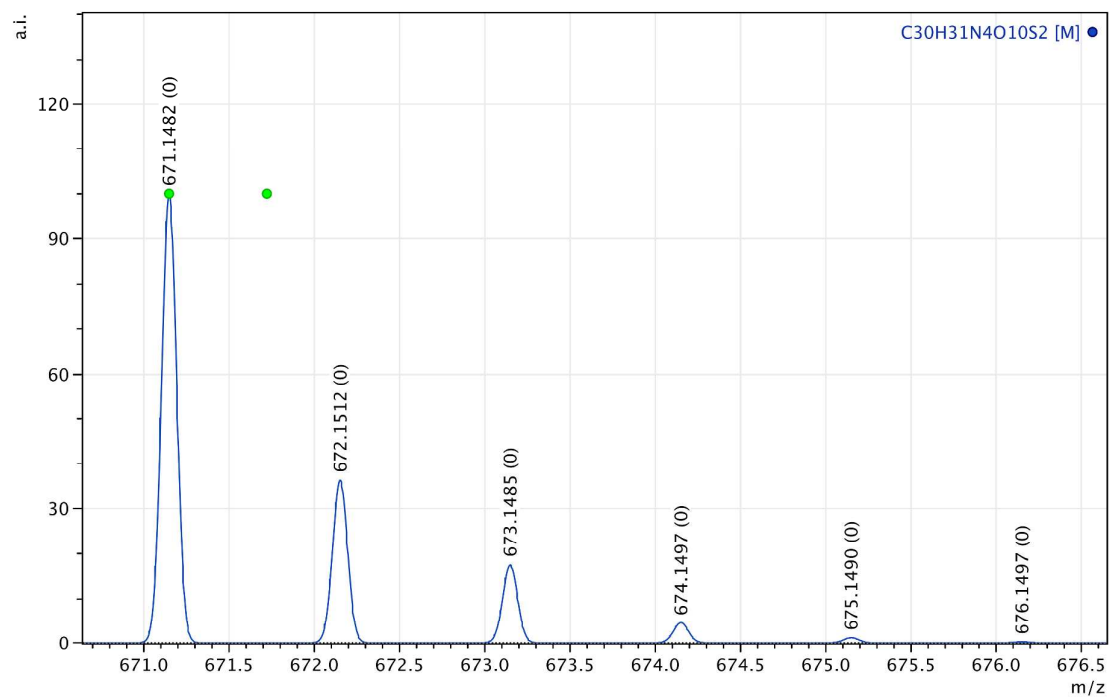

Observed at 671.1506 (calculated  $m/z$  = 671.1482). **Figure S 17.**

**Figure S 21.** Isotopic distribution simulated for  $[(\text{MB2HSO}_4)_2 + \text{HSO}_4]^-$ .

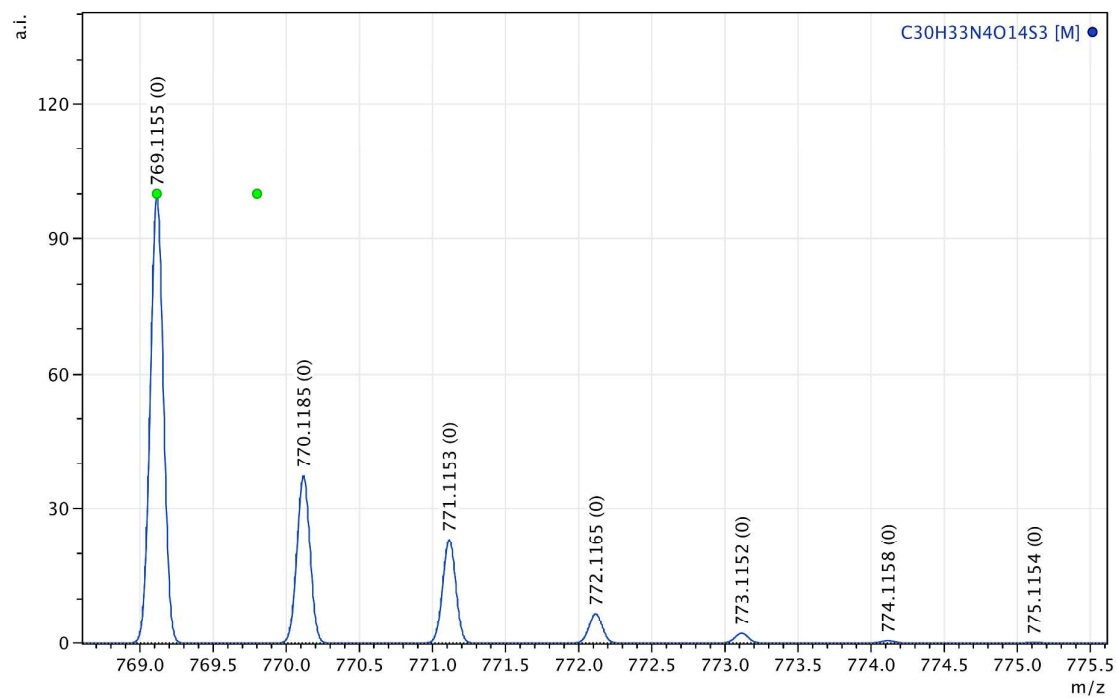

Observed at 769.1174 (calculated  $m/z$  = 769.1155). **Figure S 17.**

**Figure S 22.** Isotopic distribution simulated for  $[(\text{MB2HSO}_4)_3 - \text{H}^+]^-$

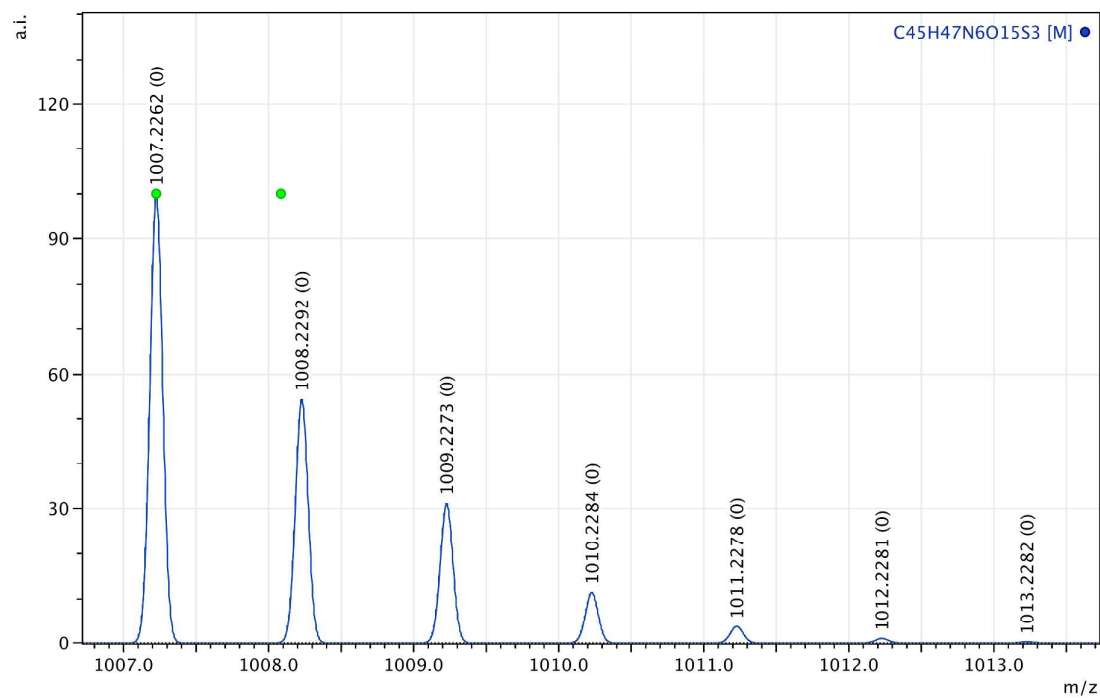

Observed at 1007.2303 (calculated  $m/z$  = 1007.2262). See **Figure S 17**.



**Figure S 23.**  $^1\text{H}$  NMR of MB3-H in  $\text{CDCl}_3$ .

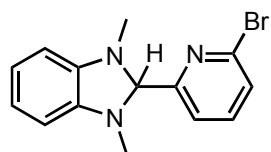

MB3-H

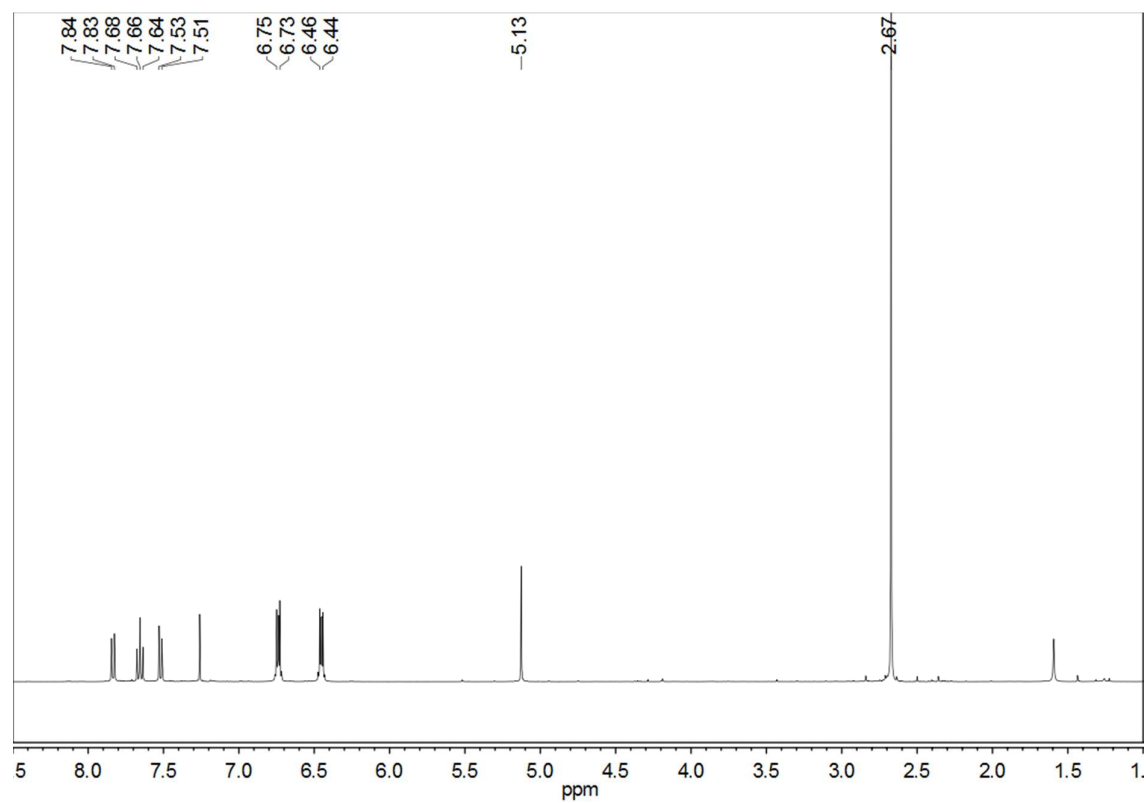

**Figure S 24.**  $^{13}\text{C}$  NMR MB3-H in  $\text{CDCl}_3$ .

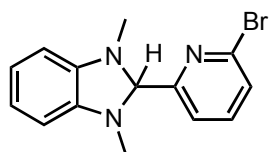

MB3-H

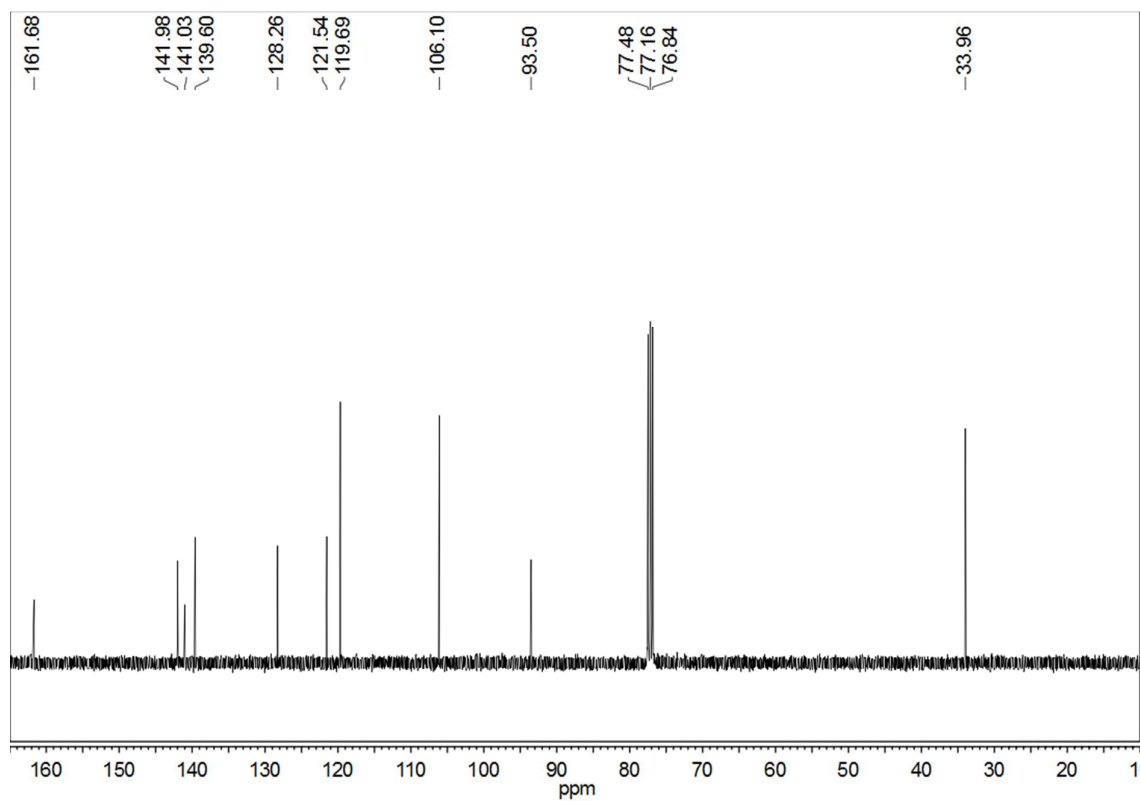

**Figure S 25.** ESI-MS of MB3-H.

$[M-H]^+ = C_{14}H_{13}BrN_3 = 302.0284$  (obs); 302.0293 (calcd.).

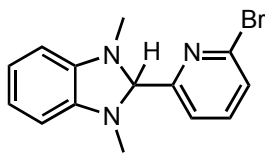

MB3-H

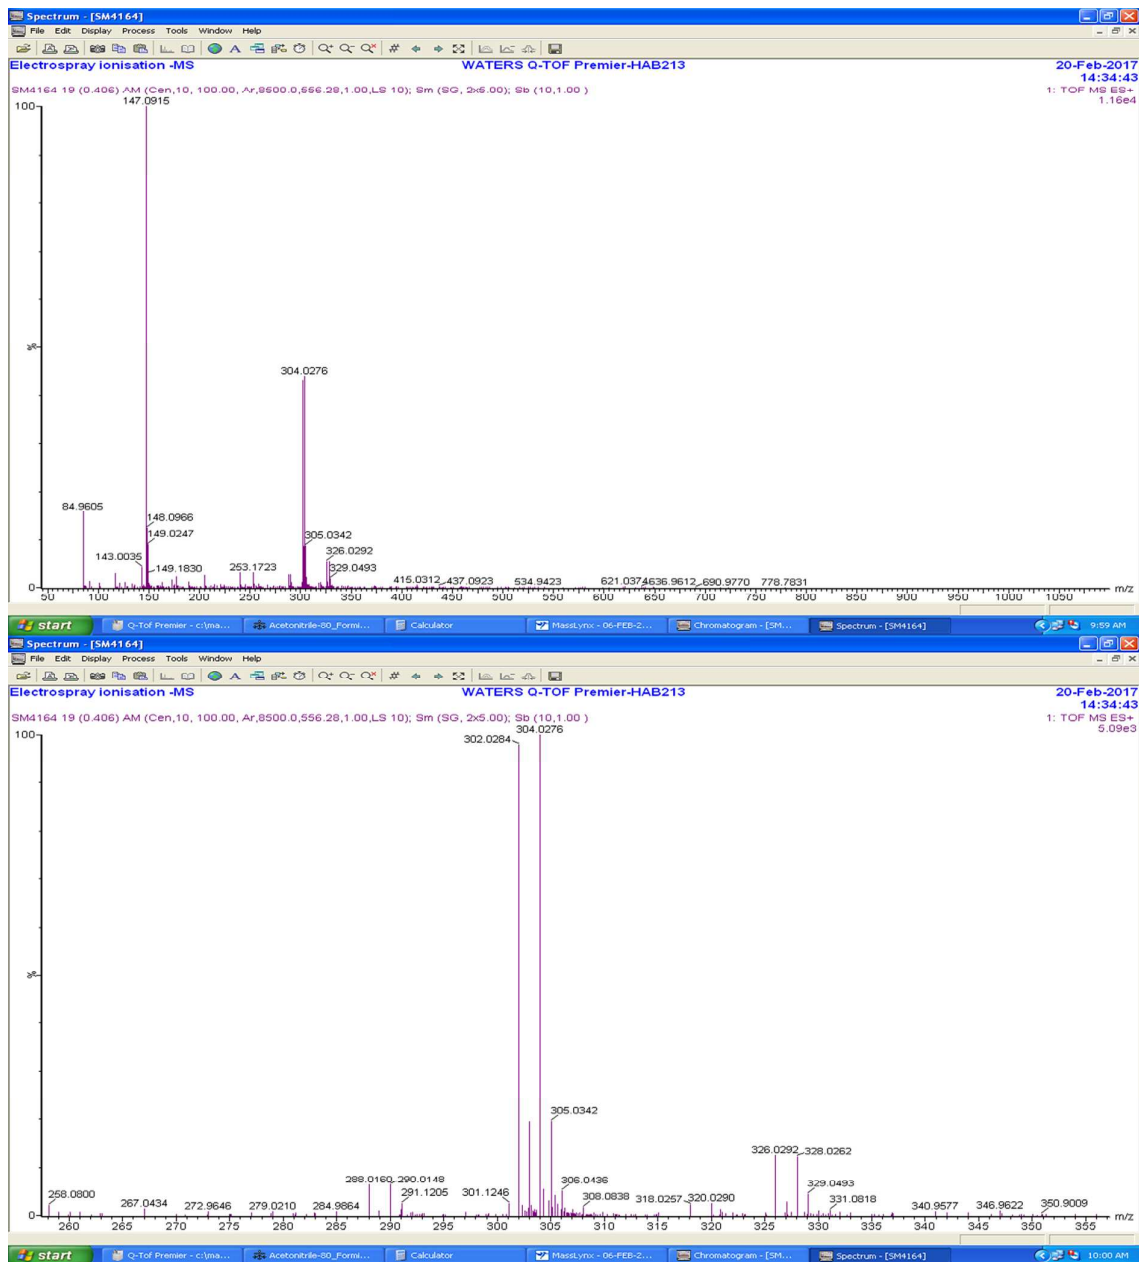

**Figure S 26.** Isotopic distribution simulated for MB3<sup>+</sup> cation.

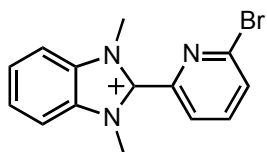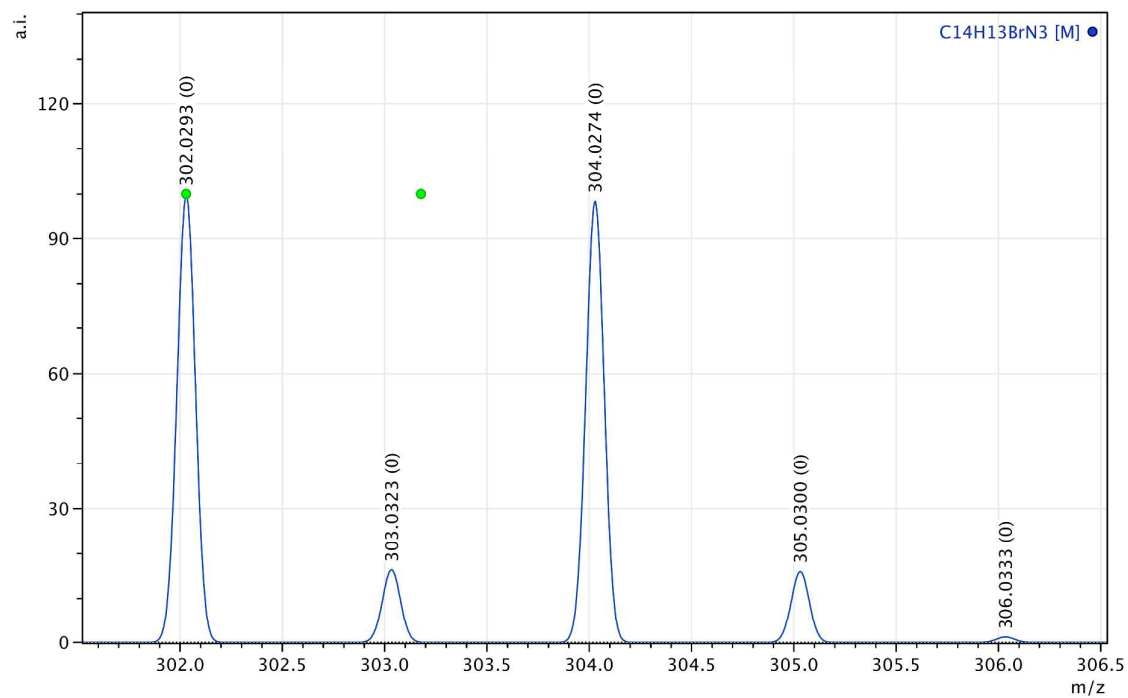

**Figure S 27.**  $^1\text{H}$  NMR of [MB3](HSO<sub>4</sub>) in DMSO-d<sub>6</sub>.

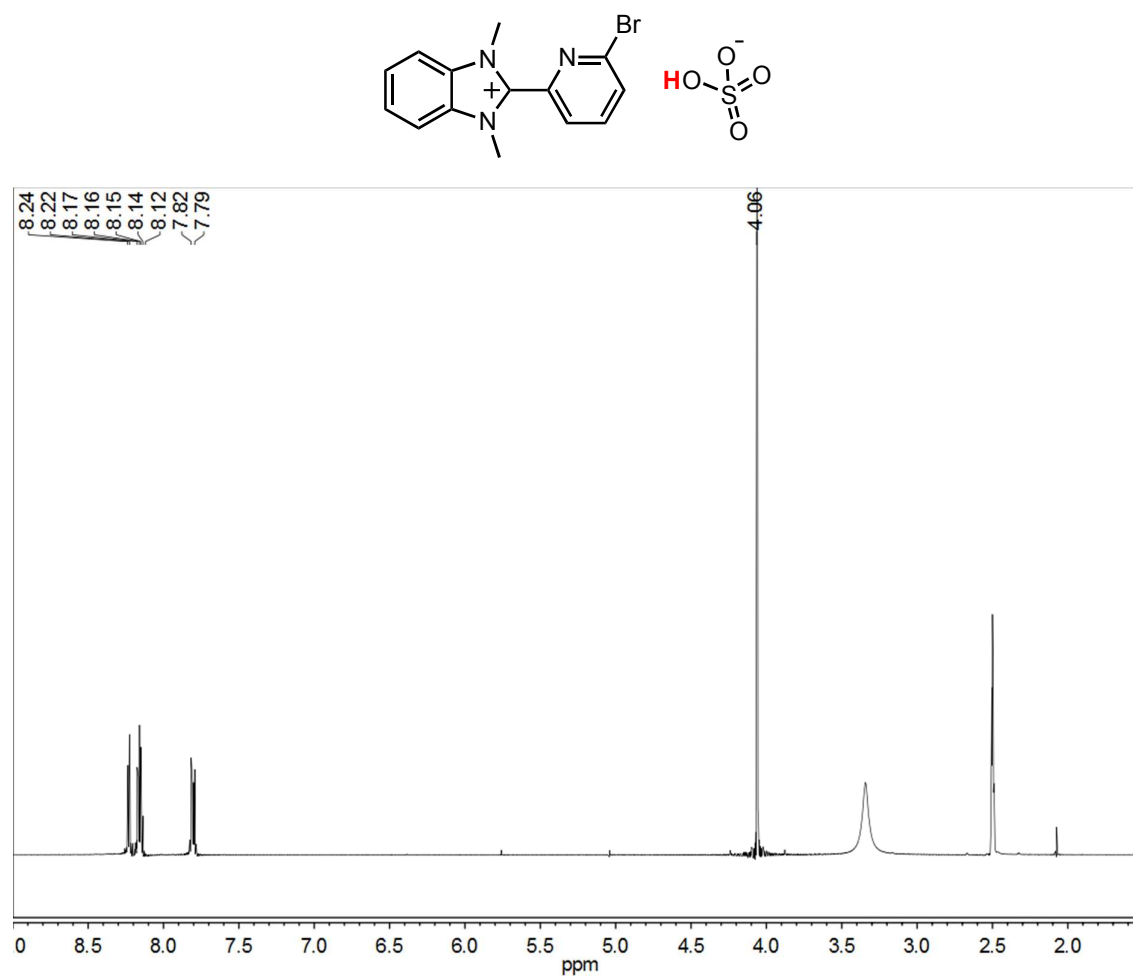

**Figure S 28.**  $^{13}\text{C}$  NMR of [MB3](HSO<sub>4</sub>) in DMSO-d<sub>6</sub>.

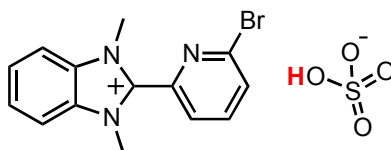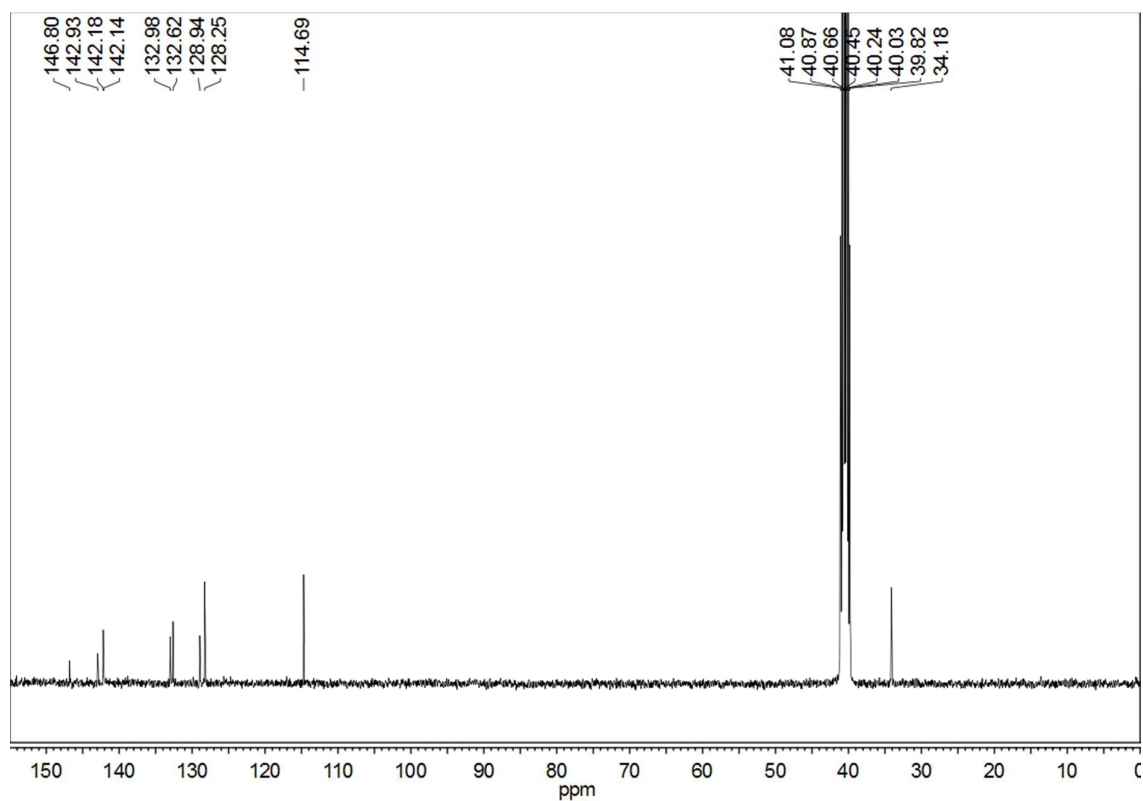

**Figure S 29.** ESI-MS of [MB3](HSO<sub>4</sub>) (cation mode).

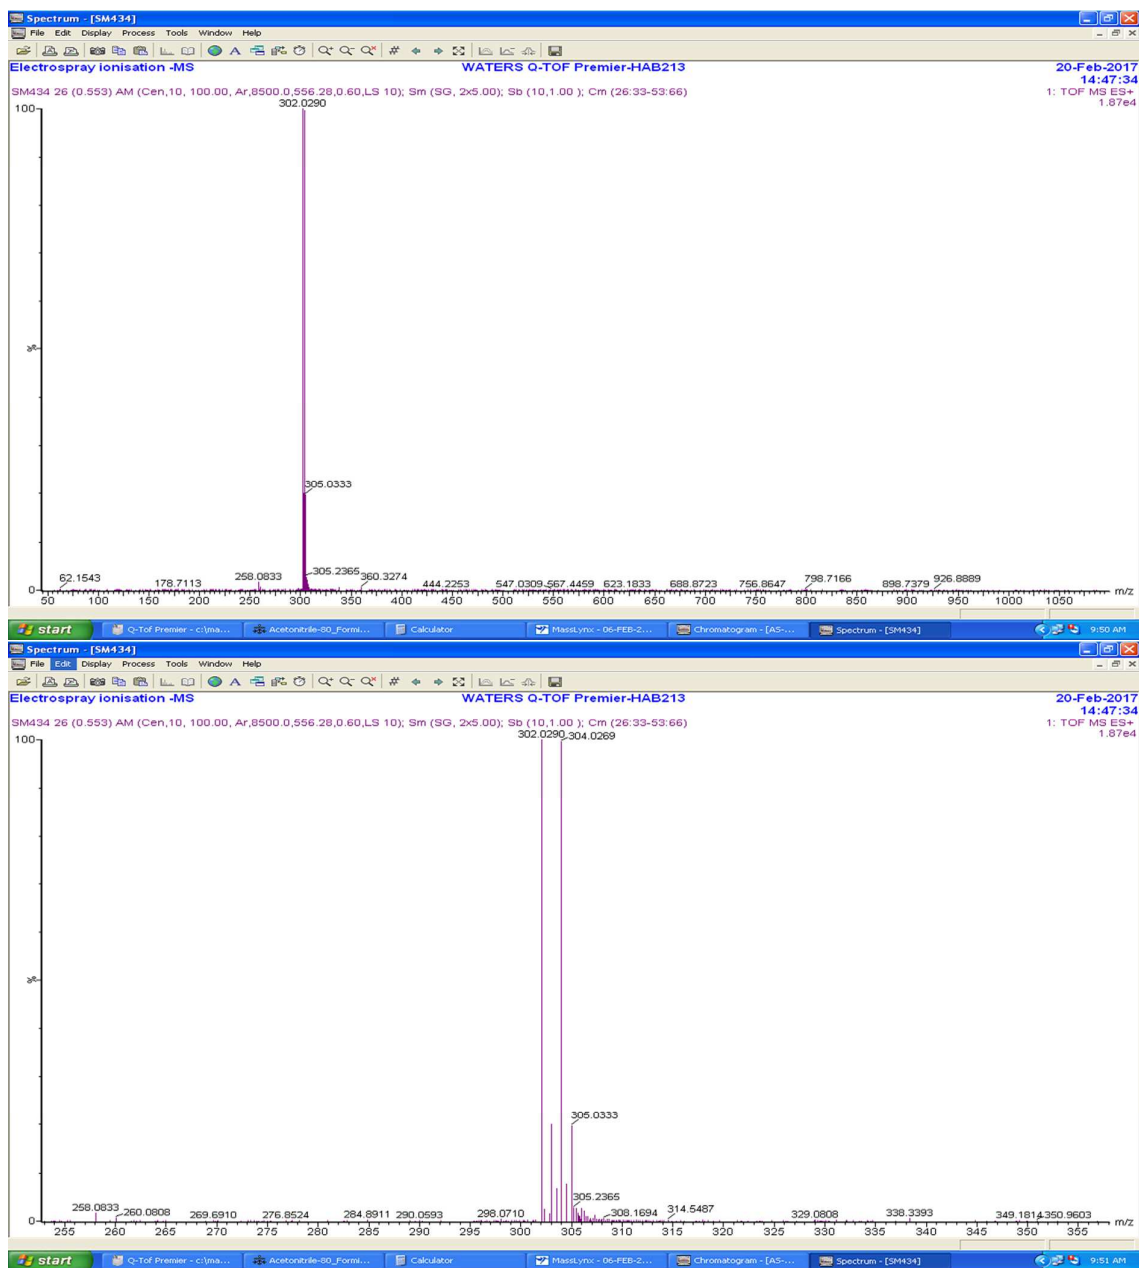

See Figure S 26 for simulated isotopic distribution.

**Figure S 30.** ESI-MS of [MB3](HSO<sub>4</sub>) (anion mode).

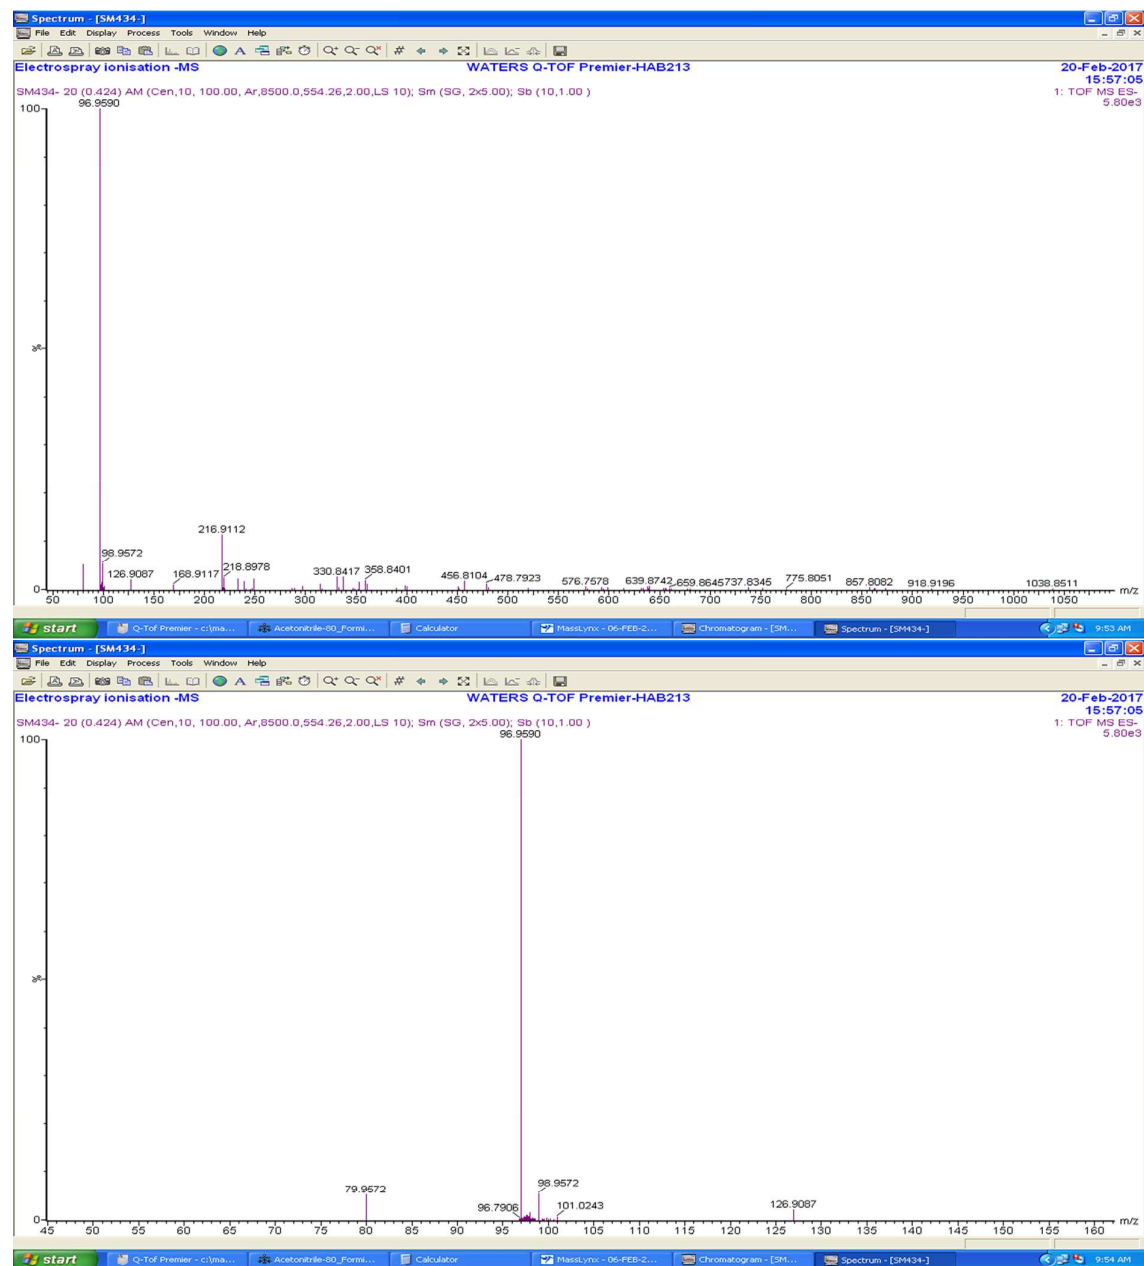

See Figure S 9 for simulated isotopic distribution.



**Figure S 31.** Solid state structure of [MB1](HSO<sub>4</sub>)

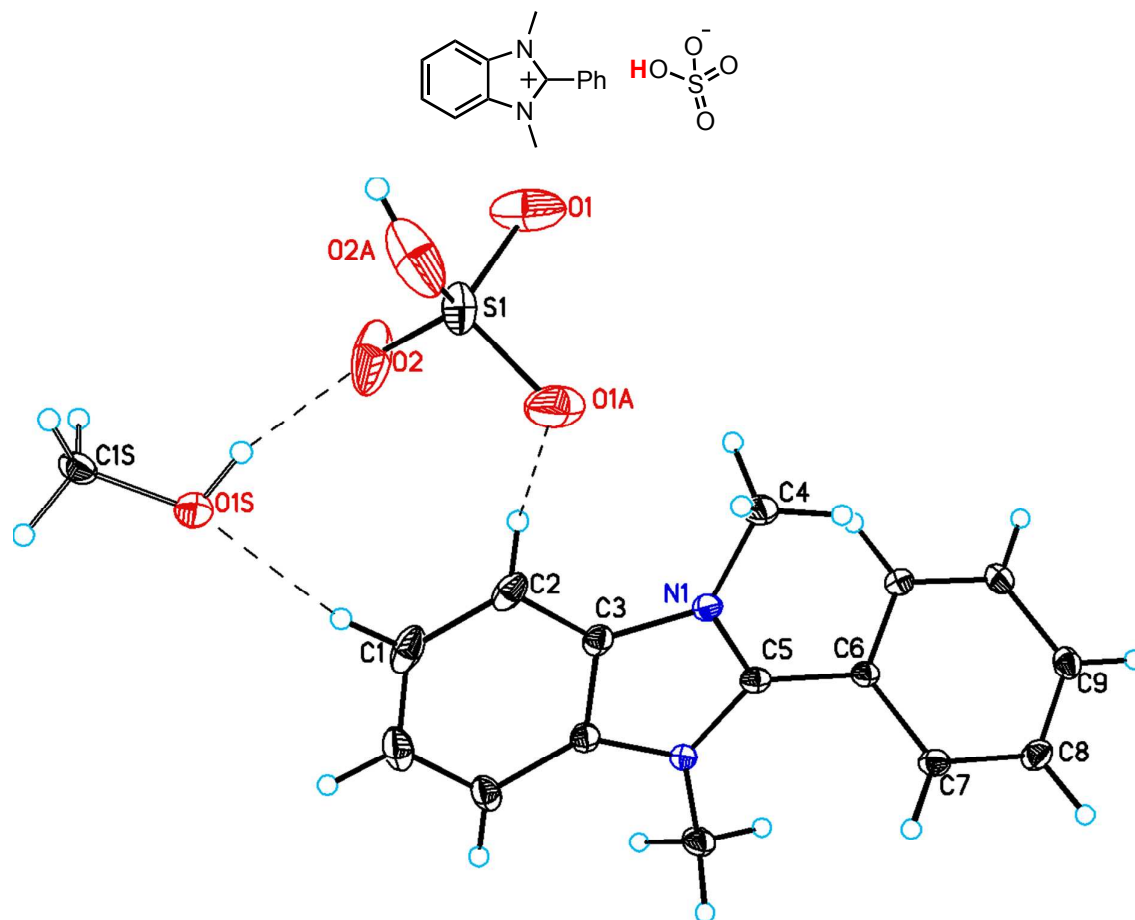

Selected distances(Å) and angles(°): S(1)-O(2)#1, 1.408(4); S(1)-O(2), 1.408(4); S(1)-O(2A), 1.477(18); S(1)-O(2A)#1, 1.477(18); S(1)-O(1), 1.495(4); S(1)-O(1)#1, 1.495(4); S(1)-O(1A), 1.528(16); S(1)-O(1A)#1, 1.528(16); O(2)#1-S(1)-O(2), 116.5(3); O(2)#1-S(1)-O(2A)#1, 50.4(8); O(2)-S(1)-O(2A)#1, 93.4(7); O(2)#1-S(1)-O(1), 106.5(2); O(2)-S(1)-O(1), 111.6(3); O(2)#1-S(1)-O(1)#1, 111.6(3); O(2)-S(1)-O(1)#1, 106.5(2); O(1)-S(1)-O(1)#1, 103.4(3); O(2A)-S(1)-O(1A), 106.1(9); O(2A)#1-S(1)-O(1A), 13.8(11); O(2)#1-S(1)-O(1A)#1, 73.5(9); O(2)-S(1)-O(1A)#1, 159.5(7); O(1)-S(1)-O(1A)#1, 80.1(8); O(1)#1-S(1)-O(1A)#1, 53.3(7).

**Figure S 32.** Packing diagram of [MB1](HSO<sub>4</sub>)

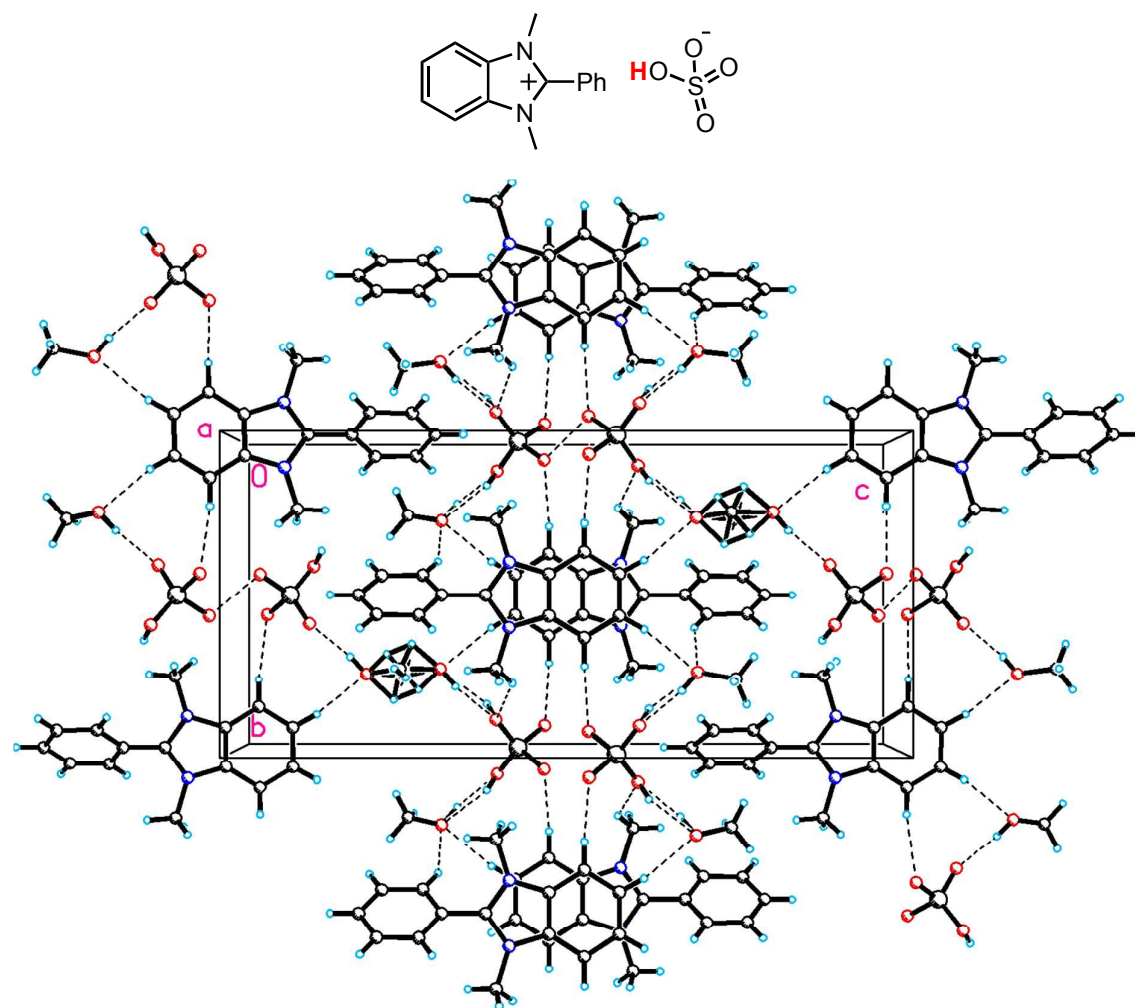

**Table S 1.** Crystal data for [MB1](HSO<sub>4</sub>)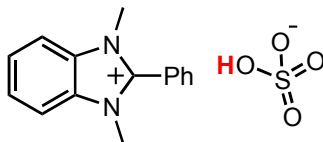

|                                   |                                                                 |                       |
|-----------------------------------|-----------------------------------------------------------------|-----------------------|
| Identification code               | 12janb                                                          | CCDC- 1541081         |
| Empirical formula                 | C <sub>16</sub> H <sub>20</sub> N <sub>2</sub> O <sub>5</sub> S |                       |
| Formula weight                    | 352.40                                                          |                       |
| Temperature                       | 100(2) K                                                        |                       |
| Wavelength                        | 0.71073 Å                                                       |                       |
| Crystal system                    | Orthorhombic                                                    |                       |
| Space group                       | P n n a                                                         |                       |
| Unit cell dimensions              | a = 6.7039(12) Å                                                | $\alpha = 90^\circ$ . |
|                                   | b = 10.6697(18) Å                                               | $\beta = 90^\circ$ .  |
|                                   | c = 22.602(4) Å                                                 | $\gamma = 90^\circ$ . |
| Volume                            | 1616.7(5) Å <sup>3</sup>                                        |                       |
| Z                                 | 4                                                               |                       |
| Density (calculated)              | 1.448 Mg/m <sup>3</sup>                                         |                       |
| Absorption coefficient            | 0.230 mm <sup>-1</sup>                                          |                       |
| F(000)                            | 744                                                             |                       |
| Theta range for data collection   | 3.170 to 25.249°.                                               |                       |
| Index ranges                      | -7<=h<=8, -12<=k<=12, -27<=l<=23                                |                       |
| Reflections collected             | 11999                                                           |                       |
| Independent reflections           | 1466 [R(int) = 0.0789]                                          |                       |
| Completeness to theta = 25.249°   | 99.9 %                                                          |                       |
| Absorption correction             | Semi-empirical from equivalents                                 |                       |
| Max. and min. transmission        | 0.7457 and 0.6437                                               |                       |
| Refinement method                 | Full-matrix least-squares on F <sup>2</sup>                     |                       |
| Data / restraints / parameters    | 1466 / 13 / 130                                                 |                       |
| Goodness-of-fit on F <sup>2</sup> | 1.024                                                           |                       |
| Final R indices [I>2sigma(I)]     | R1 = 0.0648, wR2 = 0.1552                                       |                       |
| R indices (all data)              | R1 = 0.1008, wR2 = 0.1754                                       |                       |
| Largest diff. peak and hole       | 0.782 and -0.376 e.Å <sup>-3</sup>                              |                       |

**Figure S 33.** Solid state structure of [MB2](HSO<sub>4</sub>)

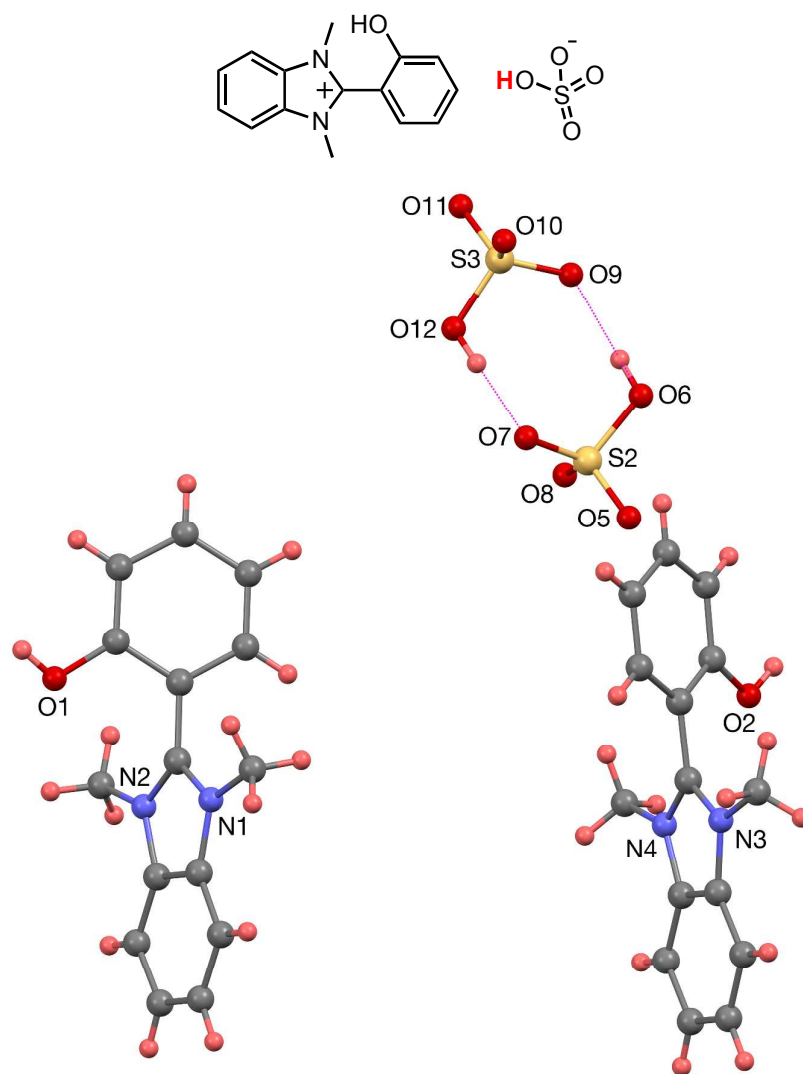

Selected distances(Å) and angles(°): S(2)-O(8) 1.4315(16); S(2)-O(5), 1.4385(16); S(2)-O(7), 1.4761(15); S(2)-O(6), 1.5574(16); S(3)-O(11), 1.4452(16); S(3)-O(10), 1.4502(16); S(3)-O(9), 1.4640(15); S(3)-O(12), 1.5521(15); O(1)-C(11), 1.352(3); O(2)-C(26), 1.348(2); N(4)-C(17), 1.338(3); N(4)-C(19), 1.390(3); N(4)-C(18), 1.460(3); N(3)-C(17), 1.341(3); N(3)-C(20), 1.396(3); N(3)-C(16), 1.468(3); N(2)-C(2), 1.341(3); N(2)-C(4), 1.388(3); N(2)-C(3), 1.467(3); N(1)-C(2), 1.336(3); N(1)-C(5), 1.395(3); N(1)-C(1), 1.469(3); O(8)-S(2)-O(5), 115.23(10); O(8)-S(2)-O(7), 111.48(10); O(5)-S(2)-O(7), 111.59(9); O(8)-S(2)-O(6), 107.90(10); O(5)-S(2)-O(6), 103.69(9); O(7)-S(2)-O(6), 106.17(9); O(11)-S(3)-O(10), 113.61(9); O(11)-S(3)-O(9), 111.64(9); O(10)-S(3)-O(9), 112.04(9); O(11)-S(3)-O(12), 104.15(9); O(10)-S(3)-O(12), 107.48(9); O(9)-S(3)-O(12), 107.33(9); C(17)-N(4)-C(19), 108.69(18); C(17)-N(4)-C(18), 126.17(18); C(19)-N(4)-C(18), 125.10(18); C(17)-N(3)-C(20), 108.57(17); C(17)-N(3)-C(16), 126.32(18); C(20)-N(3)-C(16), 125.06(18); C(2)-N(2)-C(4), 108.71(17); C(2)-N(2)-C(3), 125.82(18); C(4)-N(2)-C(3), 125.46(18); C(2)-N(1)-C(5), 108.90(17); C(2)-N(1)-C(1), 125.76(18); C(5)-N(1)-C(1), 125.33(18).

**Figure S 34.** Packing diagram of [MB2](HSO<sub>4</sub>)

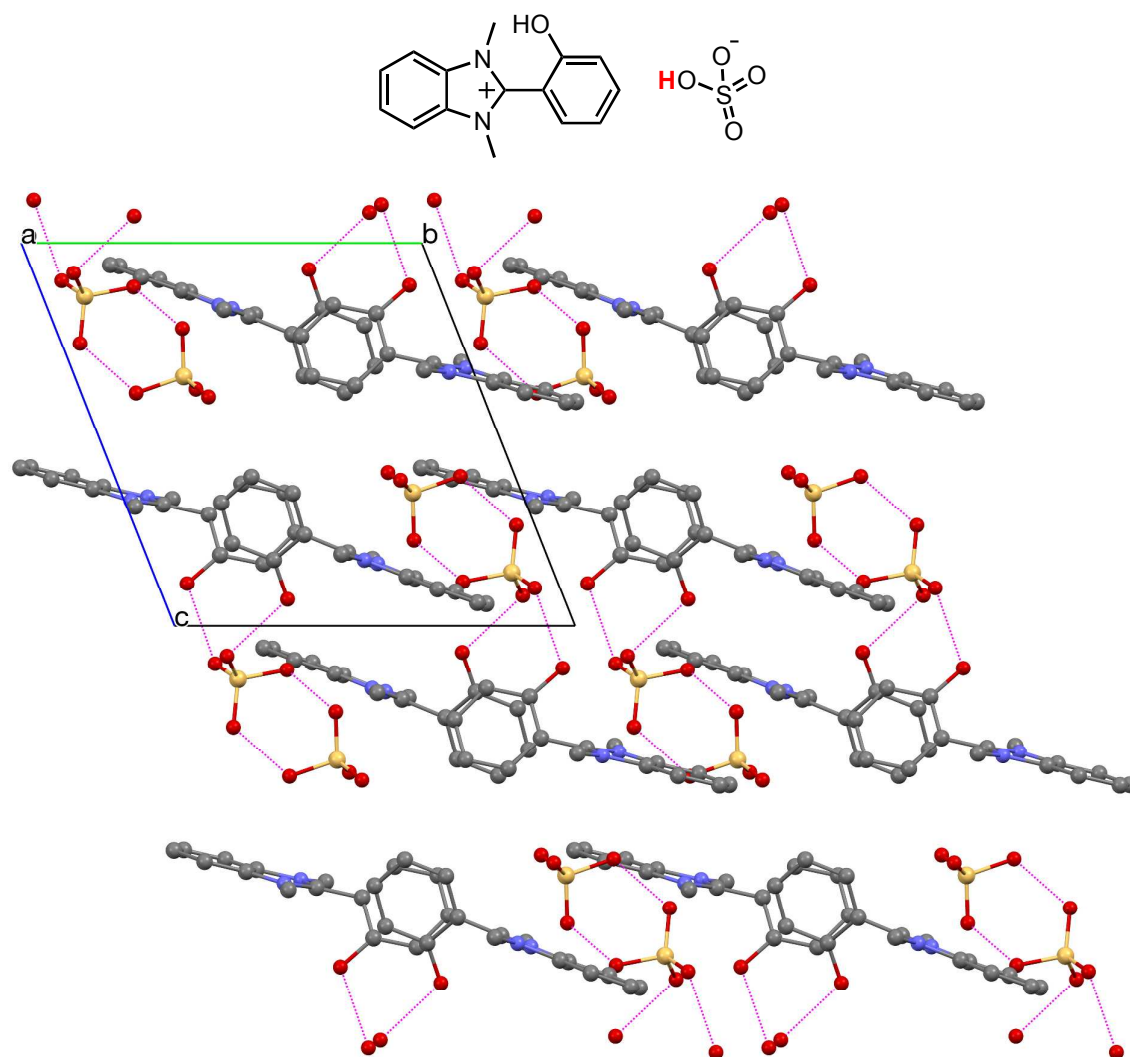

**Table S 2.** Crystal data for [MB2](HSO<sub>4</sub>)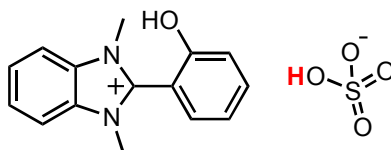

|                                   |                                                                 |                          |
|-----------------------------------|-----------------------------------------------------------------|--------------------------|
| Identification code               | 6nova_0m                                                        | CCDC- 1541079            |
| Empirical formula                 | C <sub>15</sub> H <sub>16</sub> N <sub>2</sub> O <sub>5</sub> S |                          |
| Formula weight                    | 336.36                                                          |                          |
| Temperature                       | 293(2) K                                                        |                          |
| Wavelength                        | 0.71073 Å                                                       |                          |
| Crystal system                    | Triclinic                                                       |                          |
| Space group                       | P -1                                                            |                          |
| Unit cell dimensions              | a = 10.8743(8) Å                                                | $\alpha$ = 64.0149(19)°. |
|                                   | b = 12.9713(9) Å                                                | $\beta$ = 71.014(2)°.    |
|                                   | c = 13.3718(10) Å                                               | $\gamma$ = 70.772(2)°.   |
| Volume                            | 1564.1(2) Å <sup>3</sup>                                        |                          |
| Z                                 | 4                                                               |                          |
| Density (calculated)              | 1.428 Mg/m <sup>3</sup>                                         |                          |
| Absorption coefficient            | 0.234 mm <sup>-1</sup>                                          |                          |
| F(000)                            | 704                                                             |                          |
| Crystal size                      | 0.22 x 0.20 x 0.18 mm <sup>3</sup>                              |                          |
| Theta range for data collection   | 1.98 to 26.00°.                                                 |                          |
| Index ranges                      | -13 ≤ h ≤ 13, -15 ≤ k ≤ 15, -16 ≤ l ≤ 16                        |                          |
| Reflections collected             | 20542                                                           |                          |
| Independent reflections           | 6143 [R(int) = 0.0441]                                          |                          |
| Completeness to theta = 26.00°    | 99.9 %                                                          |                          |
| Absorption correction             | None                                                            |                          |
| Refinement method                 | Full-matrix least-squares on F <sup>2</sup>                     |                          |
| Data / restraints / parameters    | 6143 / 0 / 423                                                  |                          |
| Goodness-of-fit on F <sup>2</sup> | 1.020                                                           |                          |
| Final R indices [I > 2sigma(I)]   | R1 = 0.0439, wR2 = 0.1279                                       |                          |
| R indices (all data)              | R1 = 0.0619, wR2 = 0.1427                                       |                          |
| Largest diff. peak and hole       | 0.445 and -0.557 e.Å <sup>-3</sup>                              |                          |

**Figure S 35.** Solid state structure of [MB3](HSO<sub>4</sub>)

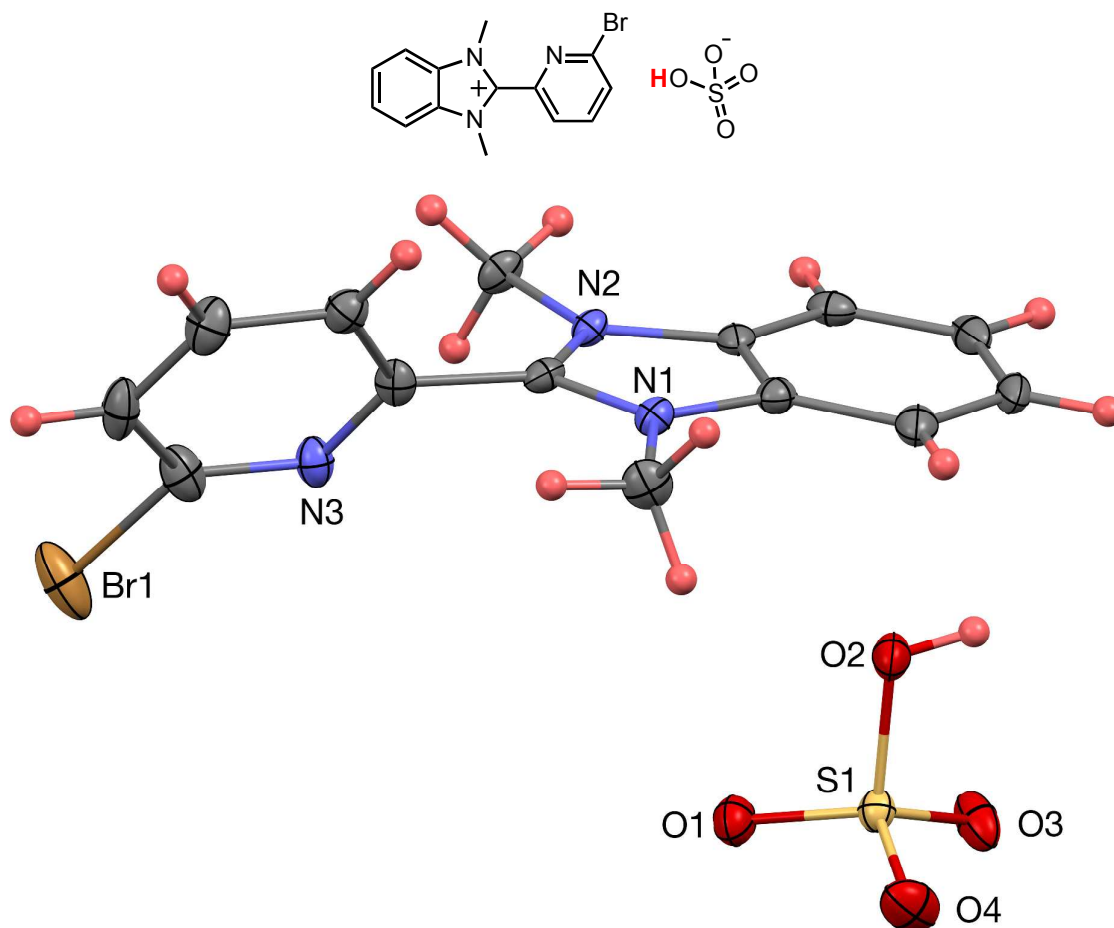

Selected distances(Å) and angles(°): Br(1)-C(14) 1.896(4); S(1)-O(4), 1.431(3); S(1)-O(1), 1.436(3); S(1)-O(3), 1.468(3); S(1)-O(2), 1.576(3); N(2)-C(2), 1.340(4); N(2)-C(4), 1.393(4); N(2)-C(1), 1.467(4); N(1)-C(2), 1.344(4); N(1)-C(9), 1.389(4); N(1)-C(3), 1.462(5); N(3)-C(14), 1.308(5); N(3)-C(10), 1.333(5); O(4)-S(1)-O(1), 114.54(17); O(4)-S(1)-O(3), 112.36(17); O(1)-S(1)-O(3), 110.75(17); O(4)-S(1)-O(2), 107.74(16); O(1)-S(1)-O(2), 105.14(14); O(3)-S(1)-O(2), 105.59(15); C(2)-N(2)-C(4), 108.7(3); C(2)-N(2)-C(1), 125.5(3); C(4)-N(2)-C(1), 125.8(3); C(2)-N(1)-C(9), 108.3(3); C(2)-N(1)-C(3), 125.9(3); C(9)-N(1)-C(3), 125.6(3); C(14)-N(3)-C(10), 116.4(3); C(4)-C(9)-N(1), 107.2(3); C(4)-C(9)-C(8), 122.2(3); N(1)-C(9)-C(8), 130.6(3); N(2)-C(2)-N(1), 109.4(3); N(2)-C(2)-C(10), 124.8(3); N(1)-C(2)-C(10), 125.7(3); N(3)-C(14)-Br(1), 117.4(3); C(13)-C(14)-Br(1), 117.4(3).

**Figure S 36.** Packing diagram of [MB3](HSO<sub>4</sub>)

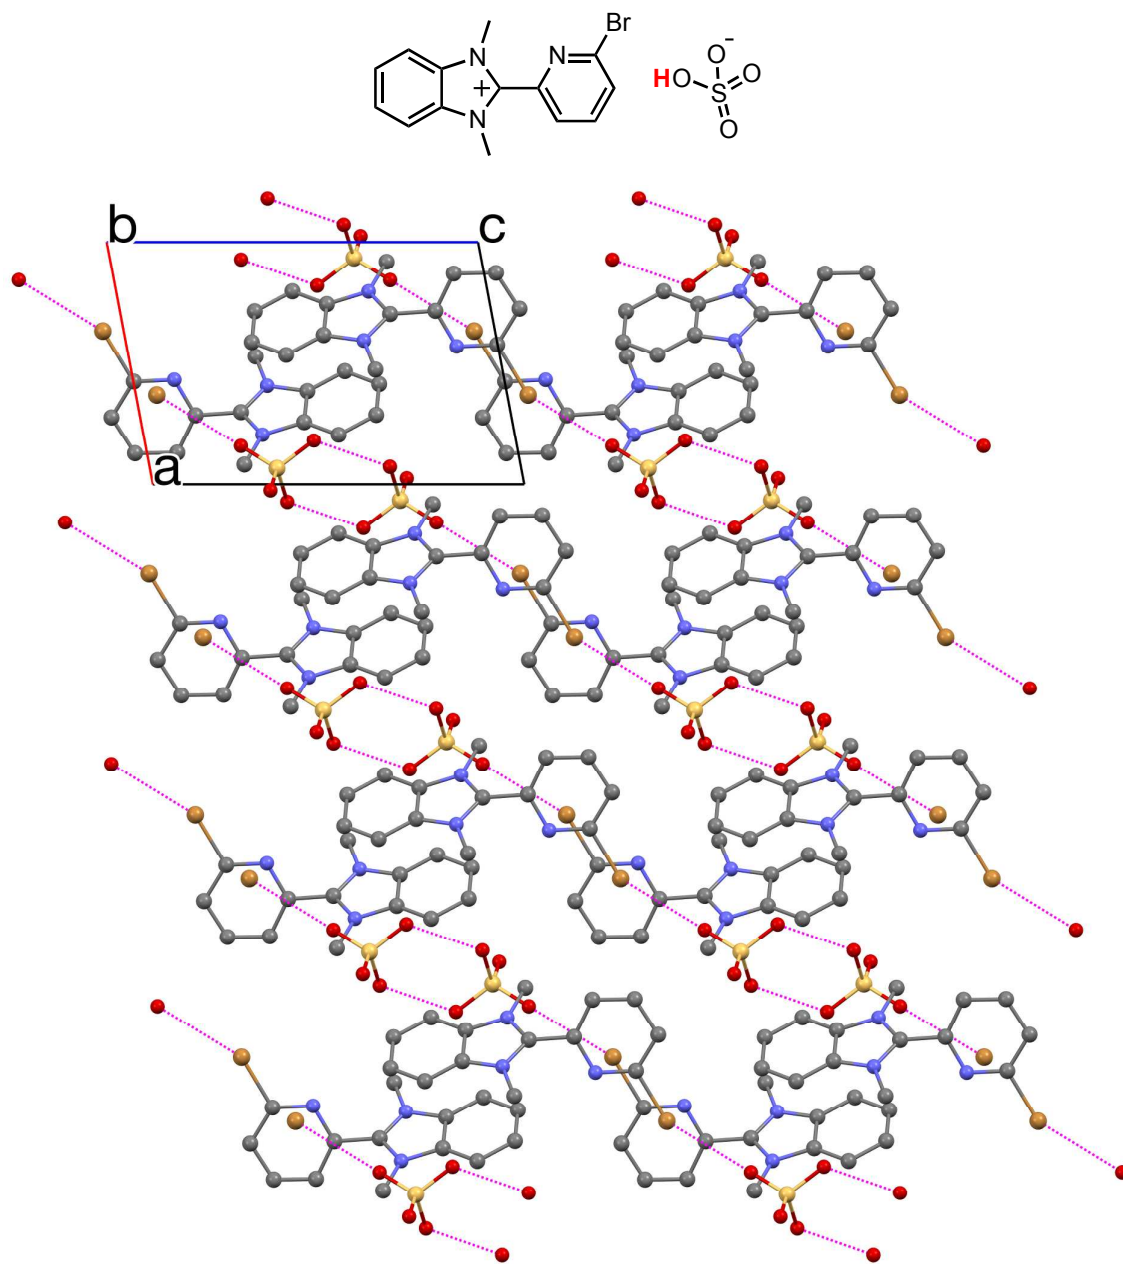



**Table S 3.** Crystal data for [MB3](HSO<sub>4</sub>).

|                                   |                                                                    |                 |
|-----------------------------------|--------------------------------------------------------------------|-----------------|
| Identification code               | 20febcb_0m                                                         | CCDC-1541080    |
| Empirical formula                 | C <sub>14</sub> H <sub>14</sub> Br N <sub>3</sub> O <sub>4</sub> S |                 |
| Formula weight                    | 400.25                                                             |                 |
| Temperature                       | 293(2) K                                                           |                 |
| Wavelength                        | 0.71073 Å                                                          |                 |
| Crystal system                    | Triclinic                                                          |                 |
| Space group                       | P -1                                                               |                 |
| Unit cell dimensions              | a = 7.907(5) Å                                                     | α = 83.119(5)°. |
|                                   | b = 8.536(5) Å                                                     | β = 78.561(5)°. |
|                                   | c = 11.911(5) Å                                                    | γ = 83.567(5)°. |
| Volume                            | 779.1(7) Å <sup>3</sup>                                            |                 |
| Z                                 | 2                                                                  |                 |
| Density (calculated)              | 1.706 Mg/m <sup>3</sup>                                            |                 |
| Absorption coefficient            | 2.796 mm <sup>-1</sup>                                             |                 |
| F(000)                            | 404                                                                |                 |
| Crystal size                      | 0.20 x 0.18 x 0.16 mm <sup>3</sup>                                 |                 |
| Theta range for data collection   | 2.64 to 25.06°.                                                    |                 |
| Index ranges                      | -9 ≤ h ≤ 9, -10 ≤ k ≤ 10, -14 ≤ l ≤ 14                             |                 |
| Reflections collected             | 9504                                                               |                 |
| Independent reflections           | 2754 [R(int) = 0.0343]                                             |                 |
| Completeness to theta = 25.06°    | 99.6 %                                                             |                 |
| Absorption correction             | None                                                               |                 |
| Refinement method                 | Full-matrix least-squares on F <sup>2</sup>                        |                 |
| Data / restraints / parameters    | 2754 / 0 / 211                                                     |                 |
| Goodness-of-fit on F <sup>2</sup> | 1.249                                                              |                 |
| Final R indices [I > 2σ(I)]       | R1 = 0.0428, wR2 = 0.1456                                          |                 |
| R indices (all data)              | R1 = 0.0495, wR2 = 0.1523                                          |                 |
| Largest diff. peak and hole       | 2.029 and -1.349 e.Å <sup>-3</sup>                                 |                 |

**References:**

1. X. Q. Zhu, M. T. Zhang, A. Yu, C. H. Wang and J. P. Cheng, *J. Am. Chem. Soc.*, 2008, 130, 2501.
2. T. Vlaar, R. C. Cioc, P. Mampuy, B. U. W. Maes, R. V. A. Orru and E. Ruijter, *Angew. Chem., Int. Ed.*, 2012, 51, 13058.
3. T. Igarashi, E. Tayama, H. Iwamoto and E. Hasegawa, *Tetrahedron Lett.*, 2013, 54, 6874.
4. MestReNova, Mestrelab Research S.L., Santiago de Compostela, Spain, [www.mestrelab.com](http://www.mestrelab.com), 2014.
5. M. Strohm, D. Kavan, P. Novak, M. Volny and V. Havlicek, *Analytical Chemistry*, 2010, 82, 4648.
